# Supplementary material for: Pathomics and single-cell analysis of papillary thyroid carcinoma reveal the pro-metastatic influence of cancer-associated fibroblasts
Source: BMC Cancer. 2024 Jun 10;24:710. doi: 10.1186/s12885-024-12459-4 (PMC11163752; doi:10.1186/s12885-024-12459-4)
Supplement: Supplementary file 1 — Supplementary Material 1 [file 12885_2024_12459_MOESM1_ESM.xlsx]

## Sheet: Data
Patient	Image	Name	IDENSITY	Level	sex	age	T	N	M	stage	Hashimoto disease	ETE	location anatomic site	focus type
YDYY-TH-17-1747	YDYY-TH-17-1747-HE-Z0906593	invasive front	3245.91	high	female	41	T1	N0	0	Ⅰ	0	0	0	0
YDYY-TH-17-0306	YDYY-TH-17-0306-HE-Z0910558	invasive front	2969.52	high	female	48	T1	N1	0	Ⅰ	0	0	0	0
YDYY-TH-17-1670	YDYY-TH-17-1670-HE-Z0915712	invasive front	2967.36	high	female	43	T1	N1	0	Ⅰ	0	0	0	0
YDYY-TH-17-0725	YDYY-TH-17-0725-HE-Z0911653	invasive front	2815.78	high	female	41	T1	N0	0	Ⅰ	0	0	0	0
YDYY-TH-17-0085	YDYY-TH-17-0085-HE-Z0905779	invasive front	2789.93	high	female	62	T1	N0	0	Ⅰ	1	0	0	1
YDYY-TH-17-0107	YDYY-TH-17-0107-HE-Z0915153	invasive front	2742.84	high	male	57	T1	N0	0	Ⅰ	0	0	1	1
YDYY-TH-17-1058	YDYY-TH-17-1058-HE-Z0907701	invasive front	2721.33	high	female	49	T2	N1	0	Ⅰ	0	0	0	0
YDYY-TH-17-0479	YDYY-TH-17-0479-HE-Z0910935	invasive front	2705.53	high	female	51	T1	N0	0	Ⅰ	0	0	0	0
YDYY-TH-17-0444	YDYY-TH-17-0444-HE-Z0919086	invasive front	2632.28	high	male	47	T1	N0	0	Ⅰ	0	0	0	0
YDYY-TH-17-0804	YDYY-TH-17-0804-HE-Z0910518	invasive front	2603.43	high	male	34	T1	N1	0	Ⅰ	1	0	1	1
YDYY-TH-17-1789	YDYY-TH-17-1789-HE-Z0600473	invasive front	2552.52	high	male	50	T2	N1	0	Ⅰ	1	0	0	0
YDYY-TH-17-1772	YDYY-TH-17-1772-HE-Z0906109	invasive front	2551.5	high	female	48	T1	N0	0	Ⅰ	1	0	1	1
YDYY-TH-17-1153	YDYY-TH-17-1153-HE-Z0910452	invasive front	2496.14	high	female	64	T1	N0	0	Ⅰ	0	0	0	0
YDYY-TH-17-0325	YDYY-TH-17-0325-HE-Z0917730	invasive front	2466.25	high	female	45	T1	N1	0	Ⅰ	1	0	1	1
YDYY-TH-17-1072	YDYY-TH-17-1072-HE-Z0916998	invasive front	2438.6	high	female	51	T1	N0	0	Ⅰ	0	0	0	0
YDYY-TH-17-0103	YDYY-TH-17-0103-HE-Z0906188	invasive front	2432.28	high	male	35	T1	N0	0	Ⅰ	0	0	0	0
YDYY-TH-17-1433	YDYY-TH-17-1433-HE-Z0918076	invasive front	2430.99	high	female	60	T1	N0	0	Ⅰ	1	0	0	0
YDYY-TH-17-1287	YDYY-TH-17-1287-HE-Z0905938	invasive front	2429.17	high	female	27	T1	N1	0	Ⅰ	1	0	1	1
YDYY-TH-17-0805	YDYY-TH-17-0805-HE-Z0907475	invasive front	2405.55	high	female	53	T1	N1	0	Ⅰ	0	0	0	0
YDYY-TH-17-1543	YDYY-TH-17-1543-HE-Z0906707	invasive front	2399.09	high	female	38	T1	N0	0	Ⅰ	1	0	0	0
YDYY-TH-17-1765	YDYY-TH-17-1765-HE-Z0911728	invasive front	2394.46	high	male	33	T1	N1	0	Ⅰ	1	0	0	0
YDYY-TH-17-0268	YDYY-TH-17-0268-HE-Z0917528	invasive front	2376.7	high	female	76	T4	N0	0	Ⅲ	0	1	0	0
YDYY-TH-17-0519	YDYY-TH-17-0519-HE-Z0918504	invasive front	2371.88	high	female	59	T3	N1	0	Ⅱ	0	1	1	1
YDYY-TH-17-0494	YDYY-TH-17-0494-HE-Z0911839	invasive front	2364.32	high	male	35	T1	N1	0	Ⅰ	0	0	1	1
YDYY-TH-17-1929	YDYY-TH-17-1929-HE-Z0600768	invasive front	2360.15	high	female	44	T1	N0	0	Ⅰ	1	0	0	0
YDYY-TH-17-1510	YDYY-TH-17-1510-HE-Z0904579	invasive front	2346.55	high	female	60	T1	N1	0	Ⅱ	0	1	0	0
YDYY-TH-17-0124	YDYY-TH-17-0124-HE-Z0913463	invasive front	2341.04	high	female	71	T1	N0	0	Ⅰ	0	0	0	0
YDYY-TH-17-0728	YDYY-TH-17-0728-HE-Z0911858	invasive front	2316.53	high	male	35	T4	N1	0	Ⅰ	0	1	1	1
YDYY-TH-17-0704	YDYY-TH-17-0704-HE-Z0917601	invasive front	2314.93	high	female	27	T1	N1	0	Ⅰ	1	0	1	1
YDYY-TH-17-0052	YDYY-TH-17-0052-HE-Z0911701	invasive front	2293.23	high	female	46	T1	N0	0	Ⅰ	1	0	0	0
YDYY-TH-17-1719	YDYY-TH-17-1719-HE-Z0909111	invasive front	2287.64	high	male	59	T2	N0	0	Ⅰ	0	0	1	1
YDYY-TH-17-1861	YDYY-TH-17-1861-HE-Z0917680	invasive front	2284.76	high	female	49	T1	N1	0	Ⅰ	1	0	0	0
YDYY-TH-17-1908	YDYY-TH-17-1908-HE-Z0910009	invasive front	2271.03	high	female	36	T1	N0	0	Ⅰ	0	0	0	0
YDYY-TH-17-1846	YDYY-TH-17-1846-HE-Z0911785	invasive front	2265.51	high	male	28	T1	N1	0	Ⅰ	0	0	0	0
YDYY-TH-17-0243	YDYY-TH-17-0243-HE-Z0922751	invasive front	2259.45	high	female	55	T1	N0	0	Ⅰ	1	0	0	1
YDYY-TH-17-0700	YDYY-TH-17-0700-HE-Z0909778	invasive front	2240.96	high	female	40	T1	N1	0	Ⅰ	1	0	0	0
YDYY-TH-17-0911	YDYY-TH-17-0911-HE-Z0909154	invasive front	2240.09	high	female	56	T1	N0	0	Ⅰ	0	0	1	1
YDYY-TH-17-1263	YDYY-TH-17-1263-HE-Z0908986	invasive front	2223.6	high	female	67	T1	N1	0	Ⅱ	0	0	0	0
YDYY-TH-17-1428	YDYY-TH-17-1428-HE-Z0913621	invasive front	2199.03	high	female	43	T1	N0	0	Ⅰ	0	0	1	1
YDYY-TH-17-1776	YDYY-TH-17-1776-HE-Z0903925	invasive front	2195.21	high	female	58	T1	N0	0	Ⅰ	1	0	0	0
YDYY-TH-17-1361	YDYY-TH-17-1361-HE-Z0918231	invasive front	2173.35	high	female	51	T4	N0	0	Ⅰ	1	1	1	1
YDYY-TH-17-0800	YDYY-TH-17-0800-HE-Z0910827	invasive front	2158.4	high	female	62	T2	N1	0	Ⅱ	0	0	0	0
YDYY-TH-17-0645	YDYY-TH-17-0645-HE-Z0906114	invasive front	2147.18	high	female	40	T1	N0	0	Ⅰ	1	0	1	1
YDYY-TH-17-1801	YDYY-TH-17-1801-HE-Z0915889	invasive front	2133.04	high	male	52	T4	N0	0	Ⅰ	0	1	0	1
YDYY-TH-17-0365	YDYY-TH-17-0365-HE-Z0922062	invasive front	2123.93	high	female	51	T1	N0	0	Ⅰ	1	0	0	0
YDYY-TH-17-1368	YDYY-TH-17-1368-HE-Z0914337	invasive front	2111.72	high	female	48	T1	N0	0	Ⅰ	0	0	0	0
YDYY-TH-17-0092	YDYY-TH-17-0092-HE-Z0915172	invasive front	2108.24	high	female	55	T1	N0	0	Ⅰ	0	0	0	0
YDYY-TH-17-0648	YDYY-TH-17-0648-HE-Z0906456	invasive front	2106.73	high	female	63	T1	N1	0	Ⅱ	0	0	0	1
YDYY-TH-17-0123	YDYY-TH-17-0123-HE-Z0918847	invasive front	2093.41	high	female	41	T1	N0	0	Ⅰ	0	0	0	0
YDYY-TH-17-0816	YDYY-TH-17-0816-HE-Z0907585	invasive front	2092.8	high	female	54	T1	N0	0	Ⅰ	1	0	1	1
YDYY-TH-17-2080	YDYY-TH-17-2080-HE-Z0909750	invasive front	2066.78	high	female	50	T1	N0	0	Ⅰ	0	0	0	1
YDYY-TH-17-1013	YDYY-TH-17-1013-HE-Z0914113	invasive front	2057.88	high	female	61	T1	N0	0	Ⅰ	1	0	0	0
YDYY-TH-17-1763	YDYY-TH-17-1763-HE-Z0909901	invasive front	2051.38	high	male	31	T1	N1	0	Ⅰ	0	0	0	0
YDYY-TH-17-0150	YDYY-TH-17-0150-HE-Z0905740	invasive front	2036.8	high	female	59	T4	N1	0	Ⅲ	0	1	1	1
YDYY-TH-17-2157	YDYY-TH-17-2157-HE-Z0916198	invasive front	2035.1	high	male	33	T1	N1	0	Ⅰ	0	0	0	0
YDYY-TH-17-0687	YDYY-TH-17-0687-HE-Z0917765	invasive front	2032.09	high	female	41	T1	N1	0	Ⅰ	0	0	0	0
YDYY-TH-17-1513	YDYY-TH-17-1513-HE-Z0905202	invasive front	2030.91	high	female	62	T1	N1	0	Ⅱ	1	0	1	1
YDYY-TH-17-1400	YDYY-TH-17-1400-HE-Z0909315	invasive front	2024	high	female	54	T1	N0	0	Ⅰ	0	0	1	1
YDYY-TH-17-1837	YDYY-TH-17-1837-HE-Z0909965	invasive front	2012.13	high	male	32	T1	N1	0	Ⅰ	0	0	0	0
YDYY-TH-17-0477	YDYY-TH-17-0477-HE-Z0919481	invasive front	1995.02	high	female	61	T3	N0	0	Ⅱ	0	1	0	0
YDYY-TH-17-0776	YDYY-TH-17-0776-HE-Z0902569	invasive front	1985.06	high	male	44	T1	N0	0	Ⅰ	0	0	0	0
YDYY-TH-17-1219	YDYY-TH-17-1219-HE-Z0916049	invasive front	1980.5	high	female	57	T1	N0	0	Ⅰ	1	0	0	1
YDYY-TH-17-1387	YDYY-TH-17-1387-HE-Z0922208	invasive front	1958.17	high	male	32	T1	N0	0	Ⅰ	0	0	0	0
YDYY-TH-17-2184	YDYY-TH-17-2184-HE-Z0903884	invasive front	1941.59	high	female	52	T4	N0	0	Ⅰ	0	1	0	0
YDYY-TH-17-1204	YDYY-TH-17-1204-HE-Z0916165	invasive front	1939.41	high	female	64	T2	N1	0	Ⅱ	0	0	1	1
YDYY-TH-17-1465	YDYY-TH-17-1465-HE-Z0906034	invasive front	1937.86	high	female	64	T1	N0	0	Ⅰ	0	0	0	1
YDYY-TH-17-0534	YDYY-TH-17-0534-HE-Z0915357	invasive front	1932.17	high	female	57	T1	N0	0	Ⅰ	1	0	0	0
YDYY-TH-17-1900	YDYY-TH-17-1900-HE-Z0904455	invasive front	1931.97	high	female	55	T1	N0	0	Ⅰ	0	0	0	0
YDYY-TH-17-0395	YDYY-TH-17-0395-HE-Z0601270	invasive front	1920.38	high	female	59	T3	N1	0	Ⅱ	0	1	0	0
YDYY-TH-17-0908	YDYY-TH-17-0908-HE-Z0909360	invasive front	1914.87	high	female	49	T1	N0	0	Ⅰ	0	0	0	0
YDYY-TH-17-1572	YDYY-TH-17-1572-HE-Z0902208	invasive front	1913.64	high	female	51	T1	N0	0	Ⅰ	0	0	1	1
YDYY-TH-17-2127	YDYY-TH-17-2127-HE-Z0902359	invasive front	1905.4	high	female	43	T1	N1	0	Ⅰ	1	0	1	1
YDYY-TH-17-1491	YDYY-TH-17-1491-HE-Z0919975	invasive front	1901.5	high	female	35	T1	N1	0	Ⅰ	1	0	0	1
YDYY-TH-17-0277	YDYY-TH-17-0277-HE-Z0902251	invasive front	1900.99	high	female	53	T1	N1	0	Ⅰ	1	0	1	1
YDYY-TH-17-1560	YDYY-TH-17-1560-HE-Z0602426	invasive front	1898.01	high	male	52	T1	N1	0	Ⅰ	0	0	0	1
YDYY-TH-17-0490	YDYY-TH-17-0490-HE-Z0906322	invasive front	1885.69	high	female	48	T1	N0	0	Ⅰ	0	0	0	0
YDYY-TH-17-1373	YDYY-TH-17-1373-HE-Z0906459	invasive front	1876.54	high	female	66	T1	N0	0	Ⅰ	0	0	0	0
YDYY-TH-17-2072	YDYY-TH-17-2072-HE-Z0911113	invasive front	1871.03	high	female	60	T1	N0	0	Ⅰ	1	0	0	0
YDYY-TH-17-0132	YDYY-TH-17-0132-HE-Z0921859	invasive front	1866.9	high	female	52	T1	N1	0	Ⅰ	1	0	0	0
YDYY-TH-17-0240	YDYY-TH-17-0240-HE-Z0906033	invasive front	1841.37	high	female	68	T1	N0	0	Ⅰ	1	0	0	0
YDYY-TH-17-0162	YDYY-TH-17-0162-HE-Z0911428	invasive front	1829.31	high	female	52	T1	N1	0	Ⅰ	0	0	0	1
YDYY-TH-17-1871	YDYY-TH-17-1871-HE-Z0600636	invasive front	1828.84	high	female	48	T3	N0	0	Ⅰ	1	1	0	0
YDYY-TH-17-0033	YDYY-TH-17-0033-HE-Z0907387	invasive front	1827.59	high	female	47	T1	N0	0	Ⅰ	0	0	1	1
YDYY-TH-17-1312	YDYY-TH-17-1312-HE-Z0906938	invasive front	1824.74	high	female	35	T1	N1	0	Ⅰ	0	0	1	1
YDYY-TH-17-0009	YDYY-TH-17-0009-HE-Z0902908	invasive front	1823.46	high	female	34	T2	N1	0	Ⅰ	1	0	1	1
YDYY-TH-17-0610	YDYY-TH-17-0610-HE-Z0906890	invasive front	1823.15	high	female	54	T1	N0	0	Ⅰ	0	0	0	0
YDYY-TH-17-0651	YDYY-TH-17-0651-HE-Z0910305	invasive front	1823.12	high	female	72	T4	N0	0	Ⅲ	0	1	0	1
YDYY-TH-17-1833	YDYY-TH-17-1833-HE-Z0910843	invasive front	1818.47	high	male	49	T3	N1	0	Ⅰ	1	1	0	1
YDYY-TH-17-0060	YDYY-TH-17-0060-HE-Z0902395	invasive front	1815.66	high	male	58	T1	N1	0	Ⅱ	0	0	1	1
YDYY-TH-17-1720	YDYY-TH-17-1720-HE-Z0910084	invasive front	1814.18	high	female	60	T1	N1	0	Ⅱ	0	0	0	0
YDYY-TH-17-0154	YDYY-TH-17-0154-HE-Z0602139	invasive front	1810.03	high	female	45	T1	N0	0	Ⅰ	0	0	0	1
YDYY-TH-17-0779	YDYY-TH-17-0779-HE-Z0913624	invasive front	1806.46	high	male	53	T1	N1	0	Ⅰ	0	0	0	1
YDYY-TH-17-2171	YDYY-TH-17-2171-HE-Z0910606	invasive front	1802.77	high	female	53	T1	N0	0	Ⅰ	0	0	0	0
YDYY-TH-17-1421	YDYY-TH-17-1421-HE-Z0902970	invasive front	1797.89	high	female	57	T1	N1	0	Ⅱ	1	0	0	0
YDYY-TH-17-1308	YDYY-TH-17-1308-HE-Z0905883	invasive front	1795.53	high	female	59	T1	N0	0	Ⅰ	1	0	0	0
YDYY-TH-17-0138	YDYY-TH-17-0138-HE-Z0911236	invasive front	1792.91	high	female	26	T2	N1	0	Ⅰ	1	0	0	0
YDYY-TH-17-0922	YDYY-TH-17-0922-HE-Z0918927	invasive front	1784.85	high	female	34	T1	N1	0	Ⅰ	0	0	0	0
YDYY-TH-17-0734	YDYY-TH-17-0734-HE-Z0905726	invasive front	1771.38	high	female	57	T1	N0	0	Ⅰ	0	0	0	1
YDYY-TH-17-0035	YDYY-TH-17-0035-HE-Z0914055	invasive front	1758.79	high	female	58	T1	N0	0	Ⅰ	0	0	0	0
YDYY-TH-17-0246	YDYY-TH-17-0246-HE-Z0906465	invasive front	1753.93	high	female	42	T3	N0	0	Ⅰ	1	1	0	1
YDYY-TH-17-0188	YDYY-TH-17-0188-HE-Z0918105	invasive front	1752.86	high	male	44	T1	N0	0	Ⅰ	0	0	0	0
YDYY-TH-17-1169	YDYY-TH-17-1169-HE-Z0909926	invasive front	1743.4	high	male	32	T1	N1	0	Ⅰ	0	0	0	0
YDYY-TH-17-1888	YDYY-TH-17-1888-HE-Z0599267	invasive front	1742.14	high	female	54	T1	N0	0	Ⅰ	0	0	0	0
YDYY-TH-17-0324	YDYY-TH-17-0324-HE-Z0902712	invasive front	1741.87	high	female	40	T1	N0	0	Ⅰ	0	0	0	0
YDYY-TH-17-0079	YDYY-TH-17-0079-HE-Z0922513	invasive front	1720.86	high	female	38	T1	N1	0	Ⅰ	0	0	0	0
YDYY-TH-17-1222	YDYY-TH-17-1222-HE-Z0902320	invasive front	1717.18	high	female	56	T1	N0	0	Ⅰ	0	0	0	0
YDYY-TH-17-0655	YDYY-TH-17-0655-HE-Z0919949	invasive front	1716.89	high	female	46	T1	N1	0	Ⅰ	1	0	0	0
YDYY-TH-17-1865	YDYY-TH-17-1865-HE-Z0911512	invasive front	1716.38	high	female	45	T1	N1	0	Ⅰ	0	0	0	0
YDYY-TH-17-0753	YDYY-TH-17-0753-HE-Z0919692	invasive front	1710.24	high	female	40	T1	N0	0	Ⅰ	1	0	0	1
YDYY-TH-17-2021	YDYY-TH-17-2021-HE-Z0904448	invasive front	1708.69	high	female	67	T1	N0	0	Ⅰ	1	0	0	0
YDYY-TH-17-0904	YDYY-TH-17-0904-HE-Z0909339	invasive front	1694.23	high	female	48	T1	N1	0	Ⅰ	1	0	0	0
YDYY-TH-17-1437	YDYY-TH-17-1437-HE-Z0917444	invasive front	1693.76	high	female	55	T4	N0	0	Ⅲ	0	1	0	0
YDYY-TH-17-1179	YDYY-TH-17-1179-HE-Z0919930	invasive front	1690.53	high	female	53	T1	N1	0	Ⅰ	0	0	0	0
YDYY-TH-17-0827	YDYY-TH-17-0827-HE-Z0906517	invasive front	1687.51	high	female	60	T1	N0	0	Ⅰ	0	0	1	1
YDYY-TH-17-0216	YDYY-TH-17-0216-HE-Z0919950	invasive front	1686.99	high	female	67	T1	N0	0	Ⅰ	0	0	0	0
YDYY-TH-17-1533	YDYY-TH-17-1533-HE-Z0906736	invasive front	1685.89	high	female	55	T1	N0	0	Ⅰ	0	0	0	1
YDYY-TH-17-0710	YDYY-TH-17-0710-HE-Z0901761	invasive front	1685.48	high	female	63	T1	N0	0	Ⅰ	0	0	0	0
YDYY-TH-17-1594	YDYY-TH-17-1594-HE-Z0910990	invasive front	1683.66	high	female	41	T1	N1	0	Ⅰ	0	0	0	1
YDYY-TH-17-1885	YDYY-TH-17-1885-HE-Z0907694	invasive front	1676.11	high	female	49	T1	N0	0	Ⅰ	0	0	1	1
YDYY-TH-17-0561	YDYY-TH-17-0561-HE-Z0909420	invasive front	1675.73	high	female	65	T4	N1	0	Ⅲ	0	1	1	1
YDYY-TH-17-1579	YDYY-TH-17-1579-HE-Z0917927	invasive front	1675.1	high	female	29	T1	N1	0	Ⅰ	1	0	0	0
YDYY-TH-17-0690	YDYY-TH-17-0690-HE-Z0918037	invasive front	1671.08	high	male	43	T1	N0	0	Ⅰ	0	0	1	1
YDYY-TH-17-2117	YDYY-TH-17-2117-HE-Z0913912	invasive front	1668.82	high	female	55	T1	N1	0	Ⅱ	1	0	0	0
YDYY-TH-17-1467	YDYY-TH-17-1467-HE-Z0904698	invasive front	1664.75	high	female	29	T1	N1	0	Ⅰ	1	0	0	1
YDYY-TH-17-0106	YDYY-TH-17-0106-HE-Z0905735	invasive front	1663.09	high	female	38	T1	N1	0	Ⅰ	1	0	1	1
YDYY-TH-17-0030	YDYY-TH-17-0030-HE-Z0903900	invasive front	1660.96	high	female	65	T3	N0	0	Ⅱ	0	1	0	0
YDYY-TH-17-2109	YDYY-TH-17-2109-HE-Z0601532	invasive front	1658.05	high	female	54	T1	N0	0	Ⅰ	0	0	0	0
YDYY-TH-17-1404	YDYY-TH-17-1404-HE-Z0902582	invasive front	1653.27	high	female	56	T4	N1	0	Ⅲ	0	1	0	0
YDYY-TH-17-2030	YDYY-TH-17-2030-HE-Z0918676	invasive front	1647.78	high	female	48	T1	N1	0	Ⅰ	0	0	0	0
YDYY-TH-17-0552	YDYY-TH-17-0552-HE-Z0907199	invasive front	1641.27	high	female	54	T4	N0	0	Ⅰ	0	1	0	0
YDYY-TH-17-0110	YDYY-TH-17-0110-HE-Z0909209	invasive front	1634.06	high	male	69	T1	N1	0	Ⅱ	0	0	0	0
YDYY-TH-17-1474	YDYY-TH-17-1474-HE-Z0909249	invasive front	1633.17	high	female	45	T1	N0	0	Ⅰ	0	0	0	0
YDYY-TH-17-0842	YDYY-TH-17-0842-HE-Z0909369	invasive front	1631.23	high	male	31	T2	N1	0	Ⅰ	1	0	0	0
YDYY-TH-17-1603	YDYY-TH-17-1603-HE-Z0913594	invasive front	1628.7	high	female	56	T1	N0	0	Ⅰ	1	0	0	0
YDYY-TH-17-1903	YDYY-TH-17-1903-HE-Z0907463	invasive front	1618.92	high	male	66	T1	N0	0	Ⅰ	0	0	0	0
YDYY-TH-17-0653	YDYY-TH-17-0653-HE-Z0917314	invasive front	1617.48	high	female	30	T1	N0	0	Ⅰ	0	0	1	1
YDYY-TH-17-1827	YDYY-TH-17-1827-HE-Z0916480	invasive front	1616.19	high	male	52	T1	N1	0	Ⅰ	0	0	0	0
YDYY-TH-17-1397	YDYY-TH-17-1397-HE-Z0909457	invasive front	1611.1	high	female	59	T1	N1	0	Ⅱ	0	0	1	1
YDYY-TH-17-0506	YDYY-TH-17-0506-HE-Z0599129	invasive front	1610.47	high	female	72	T1	N0	0	Ⅰ	0	0	1	1
YDYY-TH-17-1304	YDYY-TH-17-1304-HE-Z0919858	invasive front	1607.61	high	female	57	T1	N0	0	Ⅰ	1	0	0	0
YDYY-TH-17-2114	YDYY-TH-17-2114-HE-Z0905696	invasive front	1604.49	high	male	42	T3	N1	0	Ⅰ	0	0	0	0
YDYY-TH-17-0599	YDYY-TH-17-0599-HE-Z0911529	invasive front	1602.06	high	female	41	T1	N1	0	Ⅰ	1	0	0	0
YDYY-TH-17-0548	YDYY-TH-17-0548-HE-Z0917639	invasive front	1600.69	high	female	42	T1	N1	0	Ⅰ	0	0	0	0
YDYY-TH-17-0669	YDYY-TH-17-0669-HE-Z0911792	invasive front	1599.24	high	female	33	T1	N1	0	Ⅰ	0	0	0	0
YDYY-TH-17-2054	YDYY-TH-17-2054-HE-Z0914138	invasive front	1591.59	high	female	54	T1	N0	0	Ⅰ	0	0	1	1
YDYY-TH-17-0761	YDYY-TH-17-0761-HE-Z0918539	invasive front	1591.37	high	female	49	T1	N0	0	Ⅰ	1	0	0	0
YDYY-TH-17-0263	YDYY-TH-17-0263-HE-Z0601720	invasive front	1590.05	high	female	57	T4	N0	0	Ⅲ	0	1	1	1
YDYY-TH-17-1741	YDYY-TH-17-1741-HE-Z0906622	invasive front	1586.47	high	female	63	T1	N0	0	Ⅰ	0	0	1	1
YDYY-TH-17-1785	YDYY-TH-17-1785-HE-Z0915177	invasive front	1574.45	high	male	40	T1	N1	0	Ⅰ	0	0	0	0
YDYY-TH-17-1883	YDYY-TH-17-1883-HE-Z0909342	invasive front	1573.29	high	female	39	T1	N0	0	Ⅰ	1	0	0	1
YDYY-TH-17-0795	YDYY-TH-17-0795-HE-Z0905919	invasive front	1573.28	high	male	53	T1	N0	0	Ⅰ	0	0	0	0
YDYY-TH-17-0832	YDYY-TH-17-0832-HE-Z0903101	invasive front	1567.29	high	female	55	T1	N0	0	Ⅰ	0	0	0	0
YDYY-TH-17-1323	YDYY-TH-17-1323-HE-Z0916078	invasive front	1560.41	high	female	49	T1	N0	0	Ⅰ	0	0	0	1
YDYY-TH-17-2057	YDYY-TH-17-2057-HE-Z0905519	invasive front	1558.31	high	female	53	T1	N0	0	Ⅰ	1	0	0	1
YDYY-TH-17-0439	YDYY-TH-17-0439-HE-Z0906265	invasive front	1557.28	high	female	70	T1	N0	0	Ⅰ	0	0	0	0
YDYY-TH-17-0550	YDYY-TH-17-0550-HE-Z0918519	invasive front	1542.37	high	female	71	T1	N1	0	Ⅱ	0	0	1	1
YDYY-TH-17-1541	YDYY-TH-17-1541-HE-Z0906006	invasive front	1536.92	high	female	32	T1	N0	0	Ⅰ	0	0	0	0
YDYY-TH-17-1616	YDYY-TH-17-1616-HE-Z0919091	invasive front	1534.77	high	female	60	T1	N1	0	Ⅱ	0	0	0	0
YDYY-TH-17-1980	YDYY-TH-17-1980-HE-Z0907279	invasive front	1530.64	high	female	54	T2	N0	0	Ⅰ	1	0	0	0
YDYY-TH-17-1677	YDYY-TH-17-1677-HE-Z0911216	invasive front	1529.9	high	female	49	T1	N0	0	Ⅰ	1	0	0	0
YDYY-TH-17-0183	YDYY-TH-17-0183-HE-Z0910036	invasive front	1525.18	high	female	53	T3	N1	0	Ⅰ	1	1	0	1
YDYY-TH-17-1707	YDYY-TH-17-1707-HE-Z0918833	invasive front	1521.91	high	female	43	T1	N1	0	Ⅰ	0	0	0	0
YDYY-TH-17-0157	YDYY-TH-17-0157-HE-Z0913816	invasive front	1511.86	high	female	54	T1	N0	0	Ⅰ	0	0	0	0
YDYY-TH-17-1526	YDYY-TH-17-1526-HE-Z0916241	invasive front	1508.79	high	female	42	T1	N0	0	Ⅰ	0	0	0	1
YDYY-TH-17-1473	YDYY-TH-17-1473-HE-Z0907504	invasive front	1501.92	high	female	69	T1	N0	0	Ⅰ	1	0	0	0
YDYY-TH-17-1562	YDYY-TH-17-1562-HE-Z0909559	invasive front	1500.33	high	female	50	T3	N0	0	Ⅰ	0	1	0	0
YDYY-TH-17-1286	YDYY-TH-17-1286-HE-Z0599854	invasive front	1497.9	high	female	42	T1	N1	0	Ⅰ	0	0	1	1
YDYY-TH-17-0129	YDYY-TH-17-0129-HE-Z0904923	invasive front	1492.76	high	female	40	T1	N1	0	Ⅰ	0	0	0	0
YDYY-TH-17-1761	YDYY-TH-17-1761-HE-Z0916112	invasive front	1490.7	high	female	57	T1	N0	0	Ⅰ	0	0	1	1
YDYY-TH-17-0871	YDYY-TH-17-0871-HE-Z0922418	invasive front	1481.21	high	female	36	T1	N0	0	Ⅰ	0	0	0	0
YDYY-TH-17-0039	YDYY-TH-17-0039-HE-Z0922702	invasive front	1473.88	high	male	35	T1	N1	0	Ⅰ	0	0	1	1
YDYY-TH-17-0061	YDYY-TH-17-0061-HE-Z0919398	invasive front	1468.67	high	female	32	T1	N1	0	Ⅰ	0	0	0	0
YDYY-TH-17-1240	YDYY-TH-17-1240-HE-Z0600791	invasive front	1462.76	high	female	61	T1	N0	0	Ⅰ	1	0	0	1
YDYY-TH-17-1823	YDYY-TH-17-1823-HE-Z0910957	invasive front	1450.45	high	female	40	T4	N1	0	Ⅰ	1	1	0	0
YDYY-TH-17-1362	YDYY-TH-17-1362-HE-Z0918013	invasive front	1448.4	high	female	28	T1	N1	0	Ⅰ	0	0	0	0
YDYY-TH-17-2155	YDYY-TH-17-2155-HE-Z0902339	invasive front	1446.97	high	female	52	T1	N0	0	Ⅰ	0	0	0	0
YDYY-TH-17-2110	YDYY-TH-17-2110-HE-Z0601106	invasive front	1445.88	high	female	69	T1	N0	0	Ⅰ	0	0	0	0
YDYY-TH-17-1410	YDYY-TH-17-1410-HE-Z0600250	invasive front	1445.09	high	male	50	T4	N1	0	Ⅰ	0	1	0	0
YDYY-TH-17-1353	YDYY-TH-17-1353-HE-Z0922912	invasive front	1442.58	high	female	57	T3	N0	0	Ⅱ	0	1	0	0
YDYY-TH-17-1119	YDYY-TH-17-1119-HE-Z0914022	invasive front	1440.65	high	female	59	T1	N0	0	Ⅰ	0	0	0	1
YDYY-TH-17-0312	YDYY-TH-17-0312-HE-Z0911237	invasive front	1439.93	high	female	50	T1	N1	0	Ⅰ	0	0	1	1
YDYY-TH-17-1343	YDYY-TH-17-1343-HE-Z0922459	invasive front	1436.74	high	female	50	T1	N1	0	Ⅰ	0	0	1	1
YDYY-TH-17-2107	YDYY-TH-17-2107-HE-Z0907275	invasive front	1435.32	high	female	39	T1	N1	0	Ⅰ	1	0	0	0
YDYY-TH-17-0757	YDYY-TH-17-0757-HE-Z0904746	invasive front	1435.27	high	female	61	T1	N0	0	Ⅰ	0	0	1	1
YDYY-TH-17-0020	YDYY-TH-17-0020-HE-Z0919050	invasive front	1428.68	high	female	34	T1	N0	0	Ⅰ	1	0	0	0
YDYY-TH-17-0332	YDYY-TH-17-0332-HE-Z0913843	invasive front	1427.78	high	female	58	T1	N0	0	Ⅰ	0	0	0	0
YDYY-TH-17-0579	YDYY-TH-17-0579-HE-Z0922030	invasive front	1427.76	high	female	47	T2	N1	0	Ⅰ	0	0	0	0
YDYY-TH-17-2165	YDYY-TH-17-2165-HE-Z0909528	invasive front	1421.2	high	female	40	T1	N0	0	Ⅰ	1	0	1	1
YDYY-TH-17-1838	YDYY-TH-17-1838-HE-Z0909704	invasive front	1420.92	high	female	71	T1	N0	0	Ⅰ	0	0	1	1
YDYY-TH-17-2176	YDYY-TH-17-2176-HE-Z0915775	invasive front	1420	high	female	64	T3	N1	0	Ⅱ	0	1	1	1
YDYY-TH-17-0241	YDYY-TH-17-0241-HE-Z0917208	invasive front	1415.3	high	female	73	T1	N1	0	Ⅱ	0	0	1	1
YDYY-TH-17-1553	YDYY-TH-17-1553-HE-Z0906808	invasive front	1414.39	high	female	43	T2	N1	0	Ⅰ	0	0	1	1
YDYY-TH-17-0756	YDYY-TH-17-0756-HE-Z0918189	invasive front	1411.23	high	female	44	T3	N1	0	Ⅰ	0	1	0	0
YDYY-TH-17-0903	YDYY-TH-17-0903-HE-Z0918289	invasive front	1406.19	high	male	61	T1	N1	0	Ⅱ	0	0	1	1
YDYY-TH-17-0532	YDYY-TH-17-0532-HE-Z0922568	invasive front	1404.03	high	male	58	T1	N0	0	Ⅰ	0	0	0	0
YDYY-TH-17-1146	YDYY-TH-17-1146-HE-Z0909771	invasive front	1402.88	high	female	55	T3	N0	0	Ⅱ	0	1	1	1
YDYY-TH-17-2024	YDYY-TH-17-2024-HE-Z0910779	invasive front	1399	high	female	40	T1	N1	0	Ⅰ	1	0	0	0
YDYY-TH-17-0615	YDYY-TH-17-0615-HE-Z0914488	invasive front	1396.9	high	male	35	T2	N1	0	Ⅰ	0	0	1	1
YDYY-TH-17-1595	YDYY-TH-17-1595-HE-Z0914954	invasive front	1395.04	high	male	61	T1	N0	0	Ⅰ	0	0	0	1
YDYY-TH-17-1663	YDYY-TH-17-1663-HE-Z0922359	invasive front	1393.34	high	female	51	T1	N0	0	Ⅰ	0	0	0	0
YDYY-TH-17-2052	YDYY-TH-17-2052-HE-Z0906282	invasive front	1390.49	high	female	59	T1	N0	0	Ⅰ	0	0	0	1
YDYY-TH-17-0621	YDYY-TH-17-0621-HE-Z0922073	invasive front	1381.37	high	female	62	T2	N0	0	Ⅰ	1	0	1	1
YDYY-TH-17-0987	YDYY-TH-17-0987-HE-Z0910043	invasive front	1381.32	high	female	61	T1	N0	0	Ⅰ	0	0	0	1
YDYY-TH-17-0864	YDYY-TH-17-0864-HE-Z0914910	invasive front	1379.25	high	female	43	T1	N1	0	Ⅰ	1	0	1	1
YDYY-TH-17-1163	YDYY-TH-17-1163-HE-Z0910069	invasive front	1377.66	high	female	53	T1	N0	0	Ⅰ	0	0	0	0
YDYY-TH-17-1665	YDYY-TH-17-1665-HE-Z0921995	invasive front	1376.63	high	female	76	T4	N0	0	Ⅲ	0	1	0	0
YDYY-TH-17-1985	YDYY-TH-17-1985-HE-Z0921999	invasive front	1374.61	high	female	56	T1	N1	0	Ⅱ	0	0	0	0
YDYY-TH-17-1331	YDYY-TH-17-1331-HE-Z0918402	invasive front	1374.37	high	female	32	T4	N1	0	Ⅰ	0	1	0	0
YDYY-TH-17-1291	YDYY-TH-17-1291-HE-Z0910594	invasive front	1374.26	high	female	60	T3	N0	0	Ⅱ	1	1	1	1
YDYY-TH-17-0207	YDYY-TH-17-0207-HE-Z0911632	invasive front	1373.63	high	female	56	T1	N0	0	Ⅰ	0	0	1	1
YDYY-TH-17-0349	YDYY-TH-17-0349-HE-Z0911137	invasive front	1370.7	high	female	46	T3	N1	0	Ⅰ	0	0	0	0
YDYY-TH-17-1382	YDYY-TH-17-1382-HE-Z0907619	invasive front	1365.99	high	female	28	T1	N0	0	Ⅰ	0	0	0	0
YDYY-TH-17-0747	YDYY-TH-17-0747-HE-Z0918207	invasive front	1365.43	high	female	38	T1	N1	0	Ⅰ	0	0	0	0
YDYY-TH-17-2063	YDYY-TH-17-2063-HE-Z0921971	invasive front	1364.63	high	male	45	T1	N0	0	Ⅰ	0	0	0	0
YDYY-TH-17-0531	YDYY-TH-17-0531-HE-Z0602183	invasive front	1364.1	high	female	67	T3	N0	0	Ⅱ	0	1	0	0
YDYY-TH-17-1088	YDYY-TH-17-1088-HE-Z0915648	invasive front	1360.79	high	female	64	T1	N0	0	Ⅰ	1	0	0	0
YDYY-TH-17-2192	YDYY-TH-17-2192-HE-Z0599272	invasive front	1360.12	high	female	50	T3	N1	0	Ⅰ	0	1	0	0
YDYY-TH-17-1960	YDYY-TH-17-1960-HE-Z0909064	invasive front	1356.96	high	male	42	T1	N1	0	Ⅰ	0	0	0	0
YDYY-TH-17-1284	YDYY-TH-17-1284-HE-Z0914402	invasive front	1356.05	high	female	46	T1	N0	0	Ⅰ	1	0	1	1
YDYY-TH-17-1386	YDYY-TH-17-1386-HE-Z0915808	invasive front	1351.68	high	female	57	T1	N0	0	Ⅰ	0	0	0	0
YDYY-TH-17-0786	YDYY-TH-17-0786-HE-Z0907715	invasive front	1350.75	high	female	53	T1	N1	0	Ⅰ	0	0	0	0
YDYY-TH-17-0625	YDYY-TH-17-0625-HE-Z0602024	invasive front	1348.42	high	female	62	T1	N0	0	Ⅰ	1	0	0	0
YDYY-TH-17-1451	YDYY-TH-17-1451-HE-Z0915010	invasive front	1343.73	high	female	55	T1	N0	0	Ⅰ	0	0	0	0
YDYY-TH-17-2019	YDYY-TH-17-2019-HE-Z0907069	invasive front	1341.94	high	female	49	T1	N1	0	Ⅰ	0	0	0	0
YDYY-TH-17-0081	YDYY-TH-17-0081-HE-Z0911554	invasive front	1340.81	high	female	47	T1	N0	0	Ⅰ	0	0	0	0
YDYY-TH-17-1630	YDYY-TH-17-1630-HE-Z0918558	invasive front	1339.28	high	female	34	T1	N1	0	Ⅰ	0	0	1	1
YDYY-TH-17-0108	YDYY-TH-17-0108-HE-Z0910238	invasive front	1337.88	high	male	44	T1	N0	0	Ⅰ	0	0	0	1
YDYY-TH-17-0478	YDYY-TH-17-0478-HE-Z0919715	invasive front	1335.51	high	female	69	T1	N0	0	Ⅰ	0	0	0	0
YDYY-TH-17-1662	YDYY-TH-17-1662-HE-Z0908876	invasive front	1327.6	high	female	53	T1	N1	0	Ⅰ	0	0	0	0
YDYY-TH-17-0969	YDYY-TH-17-0969-HE-Z0905763	invasive front	1324.74	high	female	35	T1	N0	0	Ⅰ	1	0	0	0
YDYY-TH-17-1443	YDYY-TH-17-1443-HE-Z0922615	invasive front	1321.57	high	female	45	T4	N0	0	Ⅰ	0	1	0	0
YDYY-TH-17-1486	YDYY-TH-17-1486-HE-Z0909764	invasive front	1320.03	high	female	49	T1	N0	0	Ⅰ	1	0	0	0
YDYY-TH-17-0008	YDYY-TH-17-0008-HE-Z0910534	invasive front	1315.16	high	female	33	T1	N1	0	Ⅰ	0	0	1	1
YDYY-TH-17-1285	YDYY-TH-17-1285-HE-Z0918781	invasive front	1310.85	high	female	27	T1	N1	0	Ⅰ	1	0	0	0
YDYY-TH-17-0359	YDYY-TH-17-0359-HE-Z0907314	invasive front	1310.75	high	female	60	T1	N0	0	Ⅰ	0	0	0	0
YDYY-TH-17-0217	YDYY-TH-17-0217-HE-Z0919720	invasive front	1307.45	high	female	57	T1	N0	0	Ⅰ	1	1	0	0
YDYY-TH-17-0563	YDYY-TH-17-0563-HE-Z0917120	invasive front	1306.54	high	female	47	T1	N1	0	Ⅰ	0	0	1	1
YDYY-TH-17-0320	YDYY-TH-17-0320-HE-Z0602033	invasive front	1306	high	female	60	T1	N0	0	Ⅰ	0	0	1	1
YDYY-TH-17-1224	YDYY-TH-17-1224-HE-Z0919068	invasive front	1304.35	high	female	57	T1	N0	0	Ⅰ	1	0	1	1
YDYY-TH-17-0137	YDYY-TH-17-0137-HE-Z0919105	invasive front	1300.24	high	female	46	T1	N0	0	Ⅰ	0	0	0	0
YDYY-TH-17-1714	YDYY-TH-17-1714-HE-Z0601260	invasive front	1299.28	high	female	32	T1	N0	0	Ⅰ	0	0	0	0
YDYY-TH-17-1449	YDYY-TH-17-1449-HE-Z0599940	invasive front	1297.95	high	female	49	T2	N0	0	Ⅰ	1	0	0	0
YDYY-TH-17-0715	YDYY-TH-17-0715-HE-Z0602334	invasive front	1293.82	high	male	39	T1	N0	0	Ⅰ	0	0	0	0
YDYY-TH-17-1313	YDYY-TH-17-1313-HE-Z0915248	invasive front	1280.13	high	female	69	T1	N0	0	Ⅰ	0	0	0	0
YDYY-TH-17-1845	YDYY-TH-17-1845-HE-Z0910180	invasive front	1279.66	high	female	52	T1	N1	0	Ⅰ	1	0	1	1
YDYY-TH-17-0613	YDYY-TH-17-0613-HE-Z0917495	invasive front	1277.44	high	female	59	T1	N0	0	Ⅰ	0	0	0	1
YDYY-TH-17-1576	YDYY-TH-17-1576-HE-Z0909010	invasive front	1275.92	high	female	40	T1	N1	0	Ⅰ	1	0	0	0
YDYY-TH-17-1367	YDYY-TH-17-1367-HE-Z0915539	invasive front	1272.91	high	male	55	T1	N1	0	Ⅱ	0	0	0	0
YDYY-TH-17-1514	YDYY-TH-17-1514-HE-Z0918837	invasive front	1271.57	high	male	28	T1	N1	0	Ⅰ	0	0	0	0
YDYY-TH-17-1676	YDYY-TH-17-1676-HE-Z0917994	invasive front	1270.88	high	male	39	T1	N1	0	Ⅰ	0	0	0	0
YDYY-TH-17-0460	YDYY-TH-17-0460-HE-Z0903053	invasive front	1270.55	high	female	64	T1	N1	0	Ⅱ	0	0	0	0
YDYY-TH-17-1484	YDYY-TH-17-1484-HE-Z0917259	invasive front	1270.3	high	female	58	T1	N1	0	Ⅱ	0	0	1	1
YDYY-TH-17-0811	YDYY-TH-17-0811-HE-Z0919139	invasive front	1268.64	high	female	48	T1	N0	0	Ⅰ	1	0	0	0
YDYY-TH-17-0564	YDYY-TH-17-0564-HE-Z0905910	invasive front	1266.2	high	female	40	T1	N1	0	Ⅰ	0	0	1	1
YDYY-TH-17-1573	YDYY-TH-17-1573-HE-Z0917976	invasive front	1266.12	high	male	31	T1	N1	0	Ⅰ	1	0	0	0
YDYY-TH-17-0608	YDYY-TH-17-0608-HE-Z0909501	invasive front	1263.32	high	female	36	T1	N0	0	Ⅰ	1	0	0	0
YDYY-TH-17-0794	YDYY-TH-17-0794-HE-Z0916614	invasive front	1261.95	high	female	31	T1	N1	0	Ⅰ	0	0	0	0
YDYY-TH-17-1453	YDYY-TH-17-1453-HE-Z0907869	invasive front	1259.22	high	female	67	T1	N1	0	Ⅱ	0	0	1	1
YDYY-TH-17-0993	YDYY-TH-17-0993-HE-Z0910585	invasive front	1254.64	high	female	52	T1	N0	0	Ⅰ	0	0	0	0
YDYY-TH-17-1609	YDYY-TH-17-1609-HE-Z0903805	invasive front	1252.94	high	female	55	T3	N0	0	Ⅱ	0	1	0	0
YDYY-TH-17-0856	YDYY-TH-17-0856-HE-Z0920071	invasive front	1247.38	high	female	44	T1	N1	0	Ⅰ	0	0	0	0
YDYY-TH-17-0115	YDYY-TH-17-0115-HE-Z0905087	invasive front	1247.28	high	male	60	T1	N1	0	Ⅱ	1	0	0	0
YDYY-TH-17-0016	YDYY-TH-17-0016-HE-Z0917468	invasive front	1247.2	high	female	49	T1	N0	0	Ⅰ	0	0	0	1
YDYY-TH-17-1096	YDYY-TH-17-1096-HE-Z0918340	invasive front	1243.62	high	female	65	T1	N0	0	Ⅰ	1	0	0	0
YDYY-TH-17-1624	YDYY-TH-17-1624-HE-Z0906231	invasive front	1240.4	high	female	39	T2	N1	0	Ⅰ	0	0	1	1
YDYY-TH-17-0507	YDYY-TH-17-0507-HE-Z0913710	invasive front	1239.64	high	female	64	T1	N0	0	Ⅰ	0	0	0	0
YDYY-TH-17-1729	YDYY-TH-17-1729-HE-Z0909759	invasive front	1237.53	high	female	61	T4	N0	0	Ⅲ	0	1	1	1
YDYY-TH-17-0345	YDYY-TH-17-0345-HE-Z0905488	invasive front	1237.35	high	female	38	T1	N1	0	Ⅰ	0	0	0	0
YDYY-TH-17-0828	YDYY-TH-17-0828-HE-Z0910052	invasive front	1236.87	high	male	43	T1	N1	0	Ⅰ	0	0	0	0
YDYY-TH-17-1650	YDYY-TH-17-1650-HE-Z0918235	invasive front	1235.12	high	female	60	T1	N1	0	Ⅱ	0	0	1	1
YDYY-TH-17-0945	YDYY-TH-17-0945-HE-Z0913654	invasive front	1232.88	high	female	54	T2	N1	0	Ⅰ	0	0	1	1
YDYY-TH-17-0718	YDYY-TH-17-0718-HE-Z0905829	invasive front	1232.58	high	female	33	T1	N1	0	Ⅰ	0	0	0	0
YDYY-TH-17-2183	YDYY-TH-17-2183-HE-Z0910547	invasive front	1232.57	high	male	71	T1	N0	0	Ⅰ	0	0	0	0
YDYY-TH-17-1493	YDYY-TH-17-1493-HE-Z0911794	invasive front	1227.83	high	female	44	T1	N0	0	Ⅰ	1	0	0	0
YDYY-TH-17-2049	YDYY-TH-17-2049-HE-Z0909761	invasive front	1226.26	high	male	61	T2	N0	0	Ⅰ	0	0	0	0
YDYY-TH-17-0101	YDYY-TH-17-0101-HE-Z0916485	invasive front	1223.49	high	female	55	T1	N0	0	Ⅰ	0	0	0	0
YDYY-TH-17-2180	YDYY-TH-17-2180-HE-Z0921943	invasive front	1223.24	high	female	47	T1	N1	0	Ⅰ	0	0	1	1
YDYY-TH-17-0714	YDYY-TH-17-0714-HE-Z0918139	invasive front	1221.15	high	female	63	T2	N0	0	Ⅰ	1	0	1	1
YDYY-TH-17-0847	YDYY-TH-17-0847-HE-Z0907818	invasive front	1219.24	high	female	42	T1	N1	0	Ⅰ	1	0	1	1
YDYY-TH-17-0972	YDYY-TH-17-0972-HE-Z0909989	invasive front	1219.05	high	female	49	T1	N1	0	Ⅰ	1	0	1	1
YDYY-TH-17-1672	YDYY-TH-17-1672-HE-Z0907794	invasive front	1218.97	high	female	70	T4	N0	0	Ⅲ	1	1	1	1
YDYY-TH-17-0763	YDYY-TH-17-0763-HE-Z0919642	invasive front	1218.53	high	male	70	T1	N1	0	Ⅱ	0	0	1	1
YDYY-TH-17-1800	YDYY-TH-17-1800-HE-Z0910373	invasive front	1216.68	high	male	57	T1	N0	0	Ⅰ	0	0	0	0
YDYY-TH-17-1583	YDYY-TH-17-1583-HE-Z0913444	invasive front	1214.86	high	female	47	T1	N0	0	Ⅰ	0	0	0	0
YDYY-TH-17-0432	YDYY-TH-17-0432-HE-Z0907831	invasive front	1213.23	high	female	51	T1	N0	0	Ⅰ	0	0	0	0
YDYY-TH-17-2048	YDYY-TH-17-2048-HE-Z0911011	invasive front	1212.57	high	female	43	T1	N0	0	Ⅰ	0	0	0	0
YDYY-TH-17-2043	YDYY-TH-17-2043-HE-Z0602108	invasive front	1212.35	high	female	35	T2	N1	0	Ⅰ	0	0	0	0
YDYY-TH-17-1689	YDYY-TH-17-1689-HE-Z0601915	invasive front	1210.19	high	female	51	T1	N0	0	Ⅰ	1	0	0	0
YDYY-TH-17-1644	YDYY-TH-17-1644-HE-Z0917405	invasive front	1208.05	high	male	31	T1	N1	0	Ⅰ	0	0	0	0
YDYY-TH-17-0314	YDYY-TH-17-0314-HE-Z0916554	invasive front	1206.34	high	male	37	T1	N1	0	Ⅰ	0	0	0	0
YDYY-TH-17-1965	YDYY-TH-17-1965-HE-Z0906792	invasive front	1204.55	high	female	48	T1	N0	0	Ⅰ	0	0	0	0
YDYY-TH-17-0111	YDYY-TH-17-0111-HE-Z0910389	invasive front	1200.6	high	female	31	T1	N0	0	Ⅰ	0	0	0	1
YDYY-TH-17-0510	YDYY-TH-17-0510-HE-Z0599947	invasive front	1200.18	high	female	60	T1	N1	0	Ⅱ	0	0	0	0
YDYY-TH-17-1199	YDYY-TH-17-1199-HE-Z0906577	invasive front	1200.12	high	female	36	T1	N1	0	Ⅰ	1	0	0	0
YDYY-TH-17-1458	YDYY-TH-17-1458-HE-Z0906160	invasive front	1196.11	high	female	56	T4	N1	0	Ⅲ	0	1	1	1
YDYY-TH-17-1774	YDYY-TH-17-1774-HE-Z0916385	invasive front	1195.74	high	female	39	T1	N1	0	Ⅰ	0	0	1	1
YDYY-TH-17-2070	YDYY-TH-17-2070-HE-Z0599830	invasive front	1195.35	high	male	57	T1	N1	0	Ⅱ	0	0	1	1
YDYY-TH-17-0251	YDYY-TH-17-0251-HE-Z0902491	invasive front	1194.23	high	male	52	T3	N0	0	Ⅰ	0	0	0	0
YDYY-TH-17-1155	YDYY-TH-17-1155-HE-Z0903560	invasive front	1193.73	high	female	44	T1	N1	0	Ⅰ	1	0	1	1
YDYY-TH-17-0762	YDYY-TH-17-0762-HE-Z0904041	invasive front	1192.35	high	female	68	T1	N0	0	Ⅰ	0	0	0	0
YDYY-TH-17-0801	YDYY-TH-17-0801-HE-Z0910014	invasive front	1190.77	high	female	55	T1	N1	0	Ⅱ	1	0	0	0
YDYY-TH-17-0458	YDYY-TH-17-0458-HE-Z0903578	invasive front	1188.26	high	female	53	T1	N0	0	Ⅰ	0	0	0	0
YDYY-TH-17-0681	YDYY-TH-17-0681-HE-Z0906101	invasive front	1187.12	high	female	54	T1	N1	0	Ⅰ	0	0	0	0
YDYY-TH-17-1024	YDYY-TH-17-1024-HE-Z0917618	invasive front	1186.48	high	male	67	T1	N0	0	Ⅰ	0	0	0	0
YDYY-TH-17-0484	YDYY-TH-17-0484-HE-Z0910865	invasive front	1181.36	high	female	59	T1	N0	0	Ⅰ	0	0	1	1
YDYY-TH-17-1608	YDYY-TH-17-1608-HE-Z0907777	invasive front	1177.13	high	female	62	T1	N0	0	Ⅰ	0	0	0	0
YDYY-TH-17-1496	YDYY-TH-17-1496-HE-Z0915280	invasive front	1176.37	high	female	55	T2	N0	0	Ⅰ	0	0	0	0
YDYY-TH-17-0946	YDYY-TH-17-0946-HE-Z0599059	invasive front	1172.99	high	female	69	T1	N0	0	Ⅰ	0	0	1	1
YDYY-TH-17-0436	YDYY-TH-17-0436-HE-Z0906644	invasive front	1594.22	high	female	64	T1	N1	0	Ⅱ	0	0	1	1
YDYY-TH-17-1916	YDYY-TH-17-1916-HE-Z0919881	invasive front	1165.37	high	female	43	T1	N0	0	Ⅰ	0	0	0	0
YDYY-TH-17-1380	YDYY-TH-17-1380-HE-Z0600341	invasive front	1164.52	high	female	44	T1	N0	0	Ⅰ	0	0	0	0
YDYY-TH-17-0274	YDYY-TH-17-0274-HE-Z0922558	invasive front	1159.7	high	female	57	T1	N0	0	Ⅰ	0	0	0	0
YDYY-TH-17-1651	YDYY-TH-17-1651-HE-Z0915828	invasive front	1158.29	high	female	48	T1	N0	0	Ⅰ	0	0	0	0
YDYY-TH-17-1406	YDYY-TH-17-1406-HE-Z0904037	invasive front	1157.2	high	female	38	T1	N0	0	Ⅰ	0	0	0	0
YDYY-TH-17-0377	YDYY-TH-17-0377-HE-Z0922687	invasive front	1155.5	high	male	52	T1	N1	0	Ⅰ	1	0	1	1
YDYY-TH-17-1751	YDYY-TH-17-1751-HE-Z0917699	invasive front	1155.34	high	female	68	T4	N0	0	Ⅲ	0	1	1	1
YDYY-TH-17-0023	YDYY-TH-17-0023-HE-Z0902698	invasive front	1155.28	high	female	52	T4	N0	0	Ⅰ	0	1	0	0
YDYY-TH-17-1320	YDYY-TH-17-1320-HE-Z0599255	invasive front	1153.35	high	female	62	T1	N0	0	Ⅰ	0	0	0	0
YDYY-TH-17-2131	YDYY-TH-17-2131-HE-Z0918450	invasive front	1150.96	high	female	58	T1	N1	0	Ⅱ	1	0	1	1
YDYY-TH-17-0941	YDYY-TH-17-0941-HE-Z0916283	invasive front	1149.79	high	female	57	T1	N1	0	Ⅱ	0	0	0	0
YDYY-TH-17-1596	YDYY-TH-17-1596-HE-Z0911217	invasive front	1149.56	high	female	49	T1	N1	0	Ⅰ	0	0	0	1
YDYY-TH-17-2002	YDYY-TH-17-2002-HE-Z0917150	invasive front	1147.42	high	male	48	T1	N1	0	Ⅰ	0	0	1	1
YDYY-TH-17-0181	YDYY-TH-17-0181-HE-Z0918595	invasive front	1145.76	high	female	41	T1	N1	0	Ⅰ	0	0	1	1
YDYY-TH-17-0882	YDYY-TH-17-0882-HE-Z0905632	invasive front	1145.42	high	female	49	T1	N0	0	Ⅰ	0	0	0	0
YDYY-TH-17-1989	YDYY-TH-17-1989-HE-Z0922920	invasive front	1142.52	high	male	40	T1	N0	0	Ⅰ	0	0	0	0
YDYY-TH-17-0191	YDYY-TH-17-0191-HE-Z0919132	invasive front	1141.54	high	female	66	T1	N0	0	Ⅰ	0	0	0	0
YDYY-TH-17-2033	YDYY-TH-17-2033-HE-Z0916423	invasive front	1137.51	high	female	37	T1	N1	0	Ⅰ	0	0	0	0
YDYY-TH-17-1095	YDYY-TH-17-1095-HE-Z0913780	invasive front	1137.32	high	male	37	T1	N1	0	Ⅰ	1	0	0	1
YDYY-TH-17-0412	YDYY-TH-17-0412-HE-Z0922532	invasive front	1137.22	high	male	31	T1	N1	0	Ⅰ	0	0	0	1
YDYY-TH-17-1809	YDYY-TH-17-1809-HE-Z0911367	invasive front	1136.17	high	male	47	T1	N0	0	Ⅰ	0	0	0	0
YDYY-TH-17-0880	YDYY-TH-17-0880-HE-Z0906464	invasive front	1134.89	high	female	57	T1	N0	0	Ⅰ	0	0	0	0
YDYY-TH-17-2118	YDYY-TH-17-2118-HE-Z0918335	invasive front	1132.93	high	male	30	T1	N0	0	Ⅰ	0	0	0	0
YDYY-TH-17-1826	YDYY-TH-17-1826-HE-Z0903598	invasive front	1131.09	high	female	61	T1	N0	0	Ⅰ	1	0	0	0
YDYY-TH-17-1804	YDYY-TH-17-1804-HE-Z0918923	invasive front	1126.81	high	female	52	T1	N1	0	Ⅰ	1	0	1	1
YDYY-TH-17-1369	YDYY-TH-17-1369-HE-Z0906765	invasive front	1125.7	high	male	57	T1	N0	0	Ⅰ	1	0	0	0
YDYY-TH-17-1930	YDYY-TH-17-1930-HE-Z0910120	invasive front	1124.47	high	female	51	T1	N0	0	Ⅰ	1	0	0	1
YDYY-TH-17-1422	YDYY-TH-17-1422-HE-Z0902614	invasive front	1123.96	high	female	33	T3	N0	0	Ⅰ	0	1	0	0
YDYY-TH-17-0452	YDYY-TH-17-0452-HE-Z0902656	invasive front	1121.81	high	female	32	T2	N1	0	Ⅰ	1	0	0	0
YDYY-TH-17-1407	YDYY-TH-17-1407-HE-Z0600749	invasive front	1120.14	high	female	58	T3	N0	0	Ⅱ	0	1	0	0
YDYY-TH-17-0149	YDYY-TH-17-0149-HE-Z0906054	invasive front	1120.04	high	female	49	T1	N0	0	Ⅰ	1	0	0	0
YDYY-TH-17-1597	YDYY-TH-17-1597-HE-Z0601096	invasive front	1119.02	high	female	46	T1	N0	0	Ⅰ	1	0	0	0
YDYY-TH-17-0936	YDYY-TH-17-0936-HE-Z0601794	invasive front	1116.98	high	female	45	T1	N0	0	Ⅰ	0	0	0	0
YDYY-TH-17-0316	YDYY-TH-17-0316-HE-Z0915064	invasive front	1116.75	high	female	38	T1	N0	0	Ⅰ	1	0	0	0
YDYY-TH-17-1768	YDYY-TH-17-1768-HE-Z0918441	invasive front	1115.98	high	male	59	T1	N1	0	Ⅱ	0	0	1	1
YDYY-TH-17-0749	YDYY-TH-17-0749-HE-Z0915113	invasive front	1113.47	high	female	52	T1	N0	0	Ⅰ	0	0	0	0
YDYY-TH-17-0084	YDYY-TH-17-0084-HE-Z0910181	invasive front	1109.73	high	male	33	T1	N1	0	Ⅰ	0	0	1	1
YDYY-TH-17-0680	YDYY-TH-17-0680-HE-Z0906067	invasive front	1106.75	high	female	42	T1	N1	0	Ⅰ	0	0	0	0
YDYY-TH-17-0256	YDYY-TH-17-0256-HE-Z0922509	invasive front	1104.9	high	male	44	T1	N1	0	Ⅰ	0	0	0	0
YDYY-TH-17-0086	YDYY-TH-17-0086-HE-Z0907058	invasive front	1104.21	high	female	54	T1	N0	0	Ⅰ	0	0	0	0
YDYY-TH-17-0540	YDYY-TH-17-0540-HE-Z0918305	invasive front	1103.6	high	female	62	T1	N1	0	Ⅱ	0	0	0	0
YDYY-TH-17-1600	YDYY-TH-17-1600-HE-Z0919272	invasive front	1103.51	high	female	58	T1	N1	0	Ⅱ	1	0	0	0
YDYY-TH-17-0408	YDYY-TH-17-0408-HE-Z0916862	invasive front	1103.34	high	female	50	T3	N1	0	Ⅰ	1	1	0	0
YDYY-TH-17-1512	YDYY-TH-17-1512-HE-Z0909825	invasive front	1100.57	high	female	64	T1	N0	0	Ⅰ	0	0	0	0
YDYY-TH-17-1935	YDYY-TH-17-1935-HE-Z0910601	invasive front	1099.98	high	female	60	T4	N0	0	Ⅲ	0	1	1	1
YDYY-TH-17-2168	YDYY-TH-17-2168-HE-Z0919725	invasive front	1098.28	high	female	30	T1	N0	0	Ⅰ	1	0	1	1
YDYY-TH-17-0664	YDYY-TH-17-0664-HE-Z0917211	invasive front	1093.95	high	female	52	T1	N1	0	Ⅰ	0	0	0	1
YDYY-TH-17-0139	YDYY-TH-17-0139-HE-Z0902094	invasive front	1093.14	high	male	33	T1	N0	0	Ⅰ	0	0	0	0
YDYY-TH-17-1617	YDYY-TH-17-1617-HE-Z0906313	invasive front	1092.92	high	female	65	T1	N0	0	Ⅰ	1	0	0	0
YDYY-TH-17-0279	YDYY-TH-17-0279-HE-Z0910897	invasive front	1092.4	high	female	42	T2	N1	0	Ⅰ	0	0	1	1
YDYY-TH-17-1588	YDYY-TH-17-1588-HE-Z0905232	invasive front	1084.84	high	female	46	T1	N0	0	Ⅰ	0	0	0	0
YDYY-TH-17-1642	YDYY-TH-17-1642-HE-Z0907270	invasive front	1081.82	high	female	61	T1	N0	0	Ⅰ	1	0	0	0
YDYY-TH-17-1333	YDYY-TH-17-1333-HE-Z0904094	invasive front	1081.36	high	female	35	T1	N1	0	Ⅰ	1	0	1	1
YDYY-TH-17-2175	YDYY-TH-17-2175-HE-Z0918331	invasive front	1080.41	high	male	38	T1	N1	0	Ⅰ	0	0	0	0
YDYY-TH-17-1267	YDYY-TH-17-1267-HE-Z0919468	invasive front	1079.93	high	female	52	T1	N0	0	Ⅰ	1	0	0	1
YDYY-TH-17-0428	YDYY-TH-17-0428-HE-Z0905217	invasive front	1074.31	high	female	52	T1	N0	0	Ⅰ	0	0	0	0
YDYY-TH-17-1051	YDYY-TH-17-1051-HE-Z0907654	invasive front	1074.08	high	male	43	T1	N0	0	Ⅰ	0	0	0	0
YDYY-TH-17-1591	YDYY-TH-17-1591-HE-Z0917720	invasive front	1071.34	high	female	70	T2	N0	0	Ⅰ	0	0	0	0
YDYY-TH-17-1984	YDYY-TH-17-1984-HE-Z0905151	invasive front	1070.71	high	female	65	T1	N0	0	Ⅰ	0	0	0	0
YDYY-TH-17-1547	YDYY-TH-17-1547-HE-Z0602154	invasive front	1070.47	high	female	62	T1	N0	0	Ⅰ	0	0	0	0
YDYY-TH-17-0287	YDYY-TH-17-0287-HE-Z0903954	invasive front	1069.79	high	female	59	T1	N0	0	Ⅰ	0	0	1	1
YDYY-TH-17-1948	YDYY-TH-17-1948-HE-Z0917030	invasive front	1065.23	high	female	63	T1	N0	0	Ⅰ	0	0	0	1
YDYY-TH-17-1248	YDYY-TH-17-1248-HE-Z0921994	invasive front	1063.86	high	male	48	T1	N0	0	Ⅰ	1	0	0	0
YDYY-TH-17-1968	YDYY-TH-17-1968-HE-Z0910348	invasive front	1061.8	high	male	29	T1	N1	0	Ⅰ	0	0	0	0
YDYY-TH-17-1213	YDYY-TH-17-1213-HE-Z0601432	invasive front	1061.71	high	female	39	T1	N1	0	Ⅰ	1	0	0	0
YDYY-TH-17-1942	YDYY-TH-17-1942-HE-Z0903814	invasive front	1060.96	high	female	54	T1	N1	0	Ⅰ	0	0	0	0
YDYY-TH-17-0105	YDYY-TH-17-0105-HE-Z0916086	invasive front	1058.31	high	female	40	T1	N0	0	Ⅰ	0	0	0	0
YDYY-TH-17-0470	YDYY-TH-17-0470-HE-Z0918756	invasive front	1057.73	high	female	32	T1	N1	0	Ⅰ	0	0	0	0
YDYY-TH-17-1988	YDYY-TH-17-1988-HE-Z0918943	invasive front	1054.19	high	female	65	T1	N0	0	Ⅰ	0	0	0	0
YDYY-TH-17-2140	YDYY-TH-17-2140-HE-Z0907020	invasive front	1054.17	high	male	22	T1	N1	0	Ⅰ	0	0	0	0
YDYY-TH-17-0356	YDYY-TH-17-0356-HE-Z0918455	invasive front	1050.92	high	male	44	T1	N0	0	Ⅰ	0	0	0	0
YDYY-TH-17-0630	YDYY-TH-17-0630-HE-Z0599826	invasive front	1050.75	high	female	69	T1	N0	0	Ⅰ	0	0	0	0
YDYY-TH-17-0924	YDYY-TH-17-0924-HE-Z0905815	invasive front	1050.62	high	female	32	T1	N0	0	Ⅰ	1	0	0	0
YDYY-TH-17-0541	YDYY-TH-17-0541-HE-Z0919357	invasive front	1047.1	high	female	31	T1	N0	0	Ⅰ	0	0	0	0
YDYY-TH-17-0228	YDYY-TH-17-0228-HE-Z0910622	invasive front	1044.26	high	female	41	T3	N1	0	Ⅰ	1	1	1	1
YDYY-TH-17-1412	YDYY-TH-17-1412-HE-Z0913977	invasive front	1041.83	high	female	39	T1	N0	0	Ⅰ	1	0	0	0
YDYY-TH-17-1103	YDYY-TH-17-1103-HE-Z0907508	invasive front	1040.39	high	female	37	T1	N0	0	Ⅰ	1	0	1	1
YDYY-TH-17-1516	YDYY-TH-17-1516-HE-Z0600384	invasive front	1040.32	high	male	33	T1	N1	0	Ⅰ	0	0	0	0
YDYY-TH-17-1919	YDYY-TH-17-1919-HE-Z0906180	invasive front	1036.76	high	female	54	T1	N1	0	Ⅰ	0	0	1	1
YDYY-TH-17-0069	YDYY-TH-17-0069-HE-Z0911241	invasive front	1036.52	high	male	66	T1	N0	0	Ⅰ	1	0	0	0
YDYY-TH-17-0446	YDYY-TH-17-0446-HE-Z0599827	invasive front	1035.09	high	female	50	T2	N0	0	Ⅰ	0	0	0	0
YDYY-TH-17-0367	YDYY-TH-17-0367-HE-Z0918649	invasive front	1033.78	high	female	33	T1	N0	0	Ⅰ	0	0	0	0
YDYY-TH-17-0294	YDYY-TH-17-0294-HE-Z0601880	invasive front	1032.97	high	female	59	T1	N0	0	Ⅰ	0	0	0	0
YDYY-TH-17-1084	YDYY-TH-17-1084-HE-Z0602236	invasive front	1032.67	high	female	35	T1	N0	0	Ⅰ	0	0	0	0
YDYY-TH-17-1035	YDYY-TH-17-1035-HE-Z0918801	invasive front	1032.58	high	female	37	T1	N1	0	Ⅰ	0	0	1	1
YDYY-TH-17-1998	YDYY-TH-17-1998-HE-Z0906216	invasive front	1030.62	high	female	46	T1	N0	0	Ⅰ	0	0	0	0
YDYY-TH-17-0114	YDYY-TH-17-0114-HE-Z0599921	invasive front	1030.15	high	female	60	T1	N1	0	Ⅱ	1	0	0	0
YDYY-TH-17-2058	YDYY-TH-17-2058-HE-Z0918732	invasive front	1029.93	high	male	58	T1	N0	0	Ⅰ	0	0	0	0
YDYY-TH-17-0943	YDYY-TH-17-0943-HE-Z0905358	invasive front	1027.84	high	female	45	T1	N1	0	Ⅰ	0	0	0	0
YDYY-TH-17-1618	YDYY-TH-17-1618-HE-Z0916071	invasive front	1027.78	high	female	57	T1	N0	0	Ⅰ	1	0	0	0
YDYY-TH-17-0339	YDYY-TH-17-0339-HE-Z0913929	invasive front	1027.39	high	female	44	T1	N1	0	Ⅰ	0	0	0	0
YDYY-TH-17-0003	YDYY-TH-17-0003-HE-Z0915946	invasive front	1026.48	high	male	42	T1	N1	0	Ⅰ	1	0	0	0
YDYY-TH-17-1610	YDYY-TH-17-1610-HE-Z0915220	invasive front	1025.62	high	female	49	T1	N0	0	Ⅰ	0	0	0	1
YDYY-TH-17-1788	YDYY-TH-17-1788-HE-Z0904572	invasive front	1024.99	high	male	50	T1	N1	0	Ⅰ	0	0	0	0
YDYY-TH-17-0387	YDYY-TH-17-0387-HE-Z0914809	invasive front	1024.17	high	male	34	T1	N1	0	Ⅰ	0	0	0	1
YDYY-TH-17-1555	YDYY-TH-17-1555-HE-Z0906428	invasive front	1022.48	high	female	31	T1	N0	0	Ⅰ	0	0	0	0
YDYY-TH-17-0271	YDYY-TH-17-0271-HE-Z0918114	invasive front	1014.65	high	female	45	T1	N0	0	Ⅰ	0	0	1	1
YDYY-TH-17-2137	YDYY-TH-17-2137-HE-Z0918333	invasive front	1013.64	high	female	55	T1	N0	0	Ⅰ	1	0	0	0
YDYY-TH-17-0992	YDYY-TH-17-0992-HE-Z0919417	invasive front	1011.78	high	female	47	T1	N0	0	Ⅰ	0	0	1	1
YDYY-TH-17-1593	YDYY-TH-17-1593-HE-Z0914286	invasive front	1010.85	high	female	29	T2	N0	0	Ⅰ	0	0	0	0
YDYY-TH-17-1716	YDYY-TH-17-1716-HE-Z0902829	invasive front	1010.21	high	female	47	T1	N0	0	Ⅰ	0	0	0	0
YDYY-TH-17-0727	YDYY-TH-17-0727-HE-Z0919217	invasive front	1006.57	high	female	26	T3	N1	0	Ⅰ	0	0	0	0
YDYY-TH-17-0109	YDYY-TH-17-0109-HE-Z0916211	invasive front	1006.2	high	female	55	T1	N0	0	Ⅰ	1	0	0	0
YDYY-TH-17-1859	YDYY-TH-17-1859-HE-Z0602186	invasive front	1005.74	high	female	57	T3	N0	0	Ⅱ	1	1	1	1
YDYY-TH-17-1217	YDYY-TH-17-1217-HE-Z0906810	invasive front	1004.44	high	male	44	T1	N0	0	Ⅰ	0	0	0	0
YDYY-TH-17-0244	YDYY-TH-17-0244-HE-Z0915247	invasive front	1004.38	high	female	60	T1	N0	0	Ⅰ	0	0	0	0
YDYY-TH-17-0677	YDYY-TH-17-0677-HE-Z0915811	invasive front	1002.51	high	female	58	T1	N0	0	Ⅰ	0	0	0	0
YDYY-TH-17-1105	YDYY-TH-17-1105-HE-Z0600105	invasive front	1001.74	high	female	58	T3	N1	0	Ⅱ	1	1	0	0
YDYY-TH-17-1372	YDYY-TH-17-1372-HE-Z0905855	invasive front	999.216	high	female	35	T1	N1	0	Ⅰ	0	0	0	0
YDYY-TH-17-0170	YDYY-TH-17-0170-HE-Z0919575	invasive front	998.396	high	male	60	T1	N0	0	Ⅰ	0	0	1	1
YDYY-TH-17-0043	YDYY-TH-17-0043-HE-Z0918405	invasive front	998.349	high	female	73	T1	N0	0	Ⅰ	0	0	0	0
YDYY-TH-17-1252	YDYY-TH-17-1252-HE-Z0601265	invasive front	997.917	high	female	70	T2	N1	0	Ⅱ	0	0	0	0
YDYY-TH-17-0905	YDYY-TH-17-0905-HE-Z0601644	invasive front	995.546	high	female	40	T2	N1	0	Ⅰ	1	0	0	0
YDYY-TH-17-0900	YDYY-TH-17-0900-HE-Z0916747	invasive front	994.244	high	female	52	T1	N0	0	Ⅰ	1	0	0	0
YDYY-TH-17-1891	YDYY-TH-17-1891-HE-Z0911470	invasive front	989.486	high	female	28	T2	N1	0	Ⅰ	0	0	0	0
YDYY-TH-17-0297	YDYY-TH-17-0297-HE-Z0910926	invasive front	989.195	high	female	59	T1	N0	0	Ⅰ	0	0	0	0
YDYY-TH-17-1928	YDYY-TH-17-1928-HE-Z0910822	invasive front	987.404	high	female	38	T1	N1	0	Ⅰ	0	0	0	0
YDYY-TH-17-0448	YDYY-TH-17-0448-HE-Z0920115	invasive front	987.229	high	female	57	T1	N0	0	Ⅰ	0	0	0	0
YDYY-TH-17-1295	YDYY-TH-17-1295-HE-Z0918186	invasive front	984.286	high	male	57	T3	N0	0	Ⅱ	0	1	1	1
YDYY-TH-17-0090	YDYY-TH-17-0090-HE-Z0599946	invasive front	983.143	high	female	55	T1	N0	0	Ⅰ	1	0	0	0
YDYY-TH-17-1844	YDYY-TH-17-1844-HE-Z0910955	invasive front	981.866	high	female	40	T3	N1	0	Ⅰ	1	1	0	0
YDYY-TH-17-0464	YDYY-TH-17-0464-HE-Z0917754	invasive front	980.93	high	female	41	T1	N0	0	Ⅰ	0	0	1	1
YDYY-TH-17-2190	YDYY-TH-17-2190-HE-Z0901754	invasive front	980.492	high	male	46	T4	N1	0	Ⅰ	0	1	1	1
YDYY-TH-17-0977	YDYY-TH-17-0977-HE-Z0916054	invasive front	980.128	high	female	63	T1	N0	0	Ⅰ	1	0	0	0
YDYY-TH-17-0810	YDYY-TH-17-0810-HE-Z0903658	invasive front	979.83	high	female	31	T1	N1	0	Ⅰ	0	0	0	0
YDYY-TH-17-1258	YDYY-TH-17-1258-HE-Z0602257	invasive front	979.461	high	female	58	T1	N0	0	Ⅰ	0	0	0	0
YDYY-TH-17-0409	YDYY-TH-17-0409-HE-Z0917719	invasive front	977.768	high	female	54	T1	N0	0	Ⅰ	0	0	0	0
YDYY-TH-17-1319	YDYY-TH-17-1319-HE-Z0599918	invasive front	975.521	high	female	50	T1	N0	0	Ⅰ	0	0	1	1
YDYY-TH-17-0056	YDYY-TH-17-0056-HE-Z0919719	invasive front	969.432	high	male	52	T1	N0	0	Ⅰ	0	0	0	0
YDYY-TH-17-1070	YDYY-TH-17-1070-HE-Z0918122	invasive front	969.226	high	female	39	T1	N1	0	Ⅰ	0	0	0	0
YDYY-TH-17-0702	YDYY-TH-17-0702-HE-Z0919483	invasive front	969.171	high	female	67	T1	N0	0	Ⅰ	1	0	0	0
YDYY-TH-17-1355	YDYY-TH-17-1355-HE-Z0910276	invasive front	968.952	high	male	53	T1	N0	0	Ⅰ	0	0	0	0
YDYY-TH-17-2120	YDYY-TH-17-2120-HE-Z0600691	invasive front	968.557	high	female	36	T1	N1	0	Ⅰ	1	0	1	1
YDYY-TH-17-0617	YDYY-TH-17-0617-HE-Z0922020	invasive front	968.551	high	male	57	T1	N0	0	Ⅰ	0	0	0	0
YDYY-TH-17-1338	YDYY-TH-17-1338-HE-Z0906870	invasive front	967.532	high	female	50	T2	N1	0	Ⅰ	0	0	1	1
YDYY-TH-17-1622	YDYY-TH-17-1622-HE-Z0903115	invasive front	966.788	high	female	42	T4	N1	0	Ⅰ	0	1	0	0
YDYY-TH-17-1068	YDYY-TH-17-1068-HE-Z0914465	invasive front	966.378	high	female	40	T1	N1	0	Ⅰ	0	0	0	0
YDYY-TH-17-2187	YDYY-TH-17-2187-HE-Z0909799	invasive front	963.219	high	female	40	T1	N1	0	Ⅰ	0	0	0	0
YDYY-TH-17-1527	YDYY-TH-17-1527-HE-Z0922749	invasive front	960.208	high	female	62	T1	N0	0	Ⅰ	1	0	1	1
YDYY-TH-17-0104	YDYY-TH-17-0104-HE-Z0601232	invasive front	959.656	high	female	39	T2	N1	0	Ⅰ	0	0	0	0
YDYY-TH-17-2130	YDYY-TH-17-2130-HE-Z0911493	invasive front	958.044	high	male	36	T1	N1	0	Ⅰ	0	0	0	0
YDYY-TH-17-1329	YDYY-TH-17-1329-HE-Z0919239	invasive front	957.018	high	male	39	T3	N1	0	Ⅰ	0	1	1	1
YDYY-TH-17-0176	YDYY-TH-17-0176-HE-Z0917054	invasive front	956.906	high	male	63	T3	N1	0	Ⅱ	0	1	1	1
YDYY-TH-17-0590	YDYY-TH-17-0590-HE-Z0917446	invasive front	954.649	high	female	60	T1	N0	0	Ⅰ	0	0	0	0
YDYY-TH-17-0659	YDYY-TH-17-0659-HE-Z0913551	invasive front	950.831	high	female	36	T1	N1	0	Ⅰ	0	0	0	0
YDYY-TH-17-1786	YDYY-TH-17-1786-HE-Z0922193	invasive front	949.957	high	male	41	T1	N1	0	Ⅰ	1	0	0	0
YDYY-TH-17-1515	YDYY-TH-17-1515-HE-Z0915281	invasive front	947.347	high	female	33	T1	N1	0	Ⅰ	1	0	1	1
YDYY-TH-17-1260	YDYY-TH-17-1260-HE-Z0907710	invasive front	945.181	high	female	75	T1	N0	0	Ⅰ	0	0	0	0
YDYY-TH-17-0354	YDYY-TH-17-0354-HE-Z0910954	invasive front	943.663	high	male	63	T1	N1	0	Ⅱ	0	0	1	1
YDYY-TH-17-1749	YDYY-TH-17-1749-HE-Z0917965	invasive front	942.546	high	female	38	T1	N0	0	Ⅰ	0	0	0	0
YDYY-TH-17-1577	YDYY-TH-17-1577-HE-Z0915224	invasive front	940.498	high	male	37	T1	N1	0	Ⅰ	0	0	0	0
YDYY-TH-17-0619	YDYY-TH-17-0619-HE-Z0917672	invasive front	939.981	high	female	56	T1	N0	0	Ⅰ	0	0	0	0
YDYY-TH-17-0018	YDYY-TH-17-0018-HE-Z0911036	invasive front	939.239	high	female	38	T1	N0	0	Ⅰ	0	0	0	0
YDYY-TH-17-0857	YDYY-TH-17-0857-HE-Z0911599	invasive front	938.531	high	female	55	T1	N1	0	Ⅱ	0	0	1	1
YDYY-TH-17-1958	YDYY-TH-17-1958-HE-Z0601378	invasive front	938.027	high	male	64	T1	N0	0	Ⅰ	0	0	0	0
YDYY-TH-17-0140	YDYY-TH-17-0140-HE-Z0905205	invasive front	937.021	high	female	54	T1	N0	0	Ⅰ	1	0	0	1
YDYY-TH-17-1966	YDYY-TH-17-1966-HE-Z0911487	invasive front	932.914	high	male	37	T3	N1	0	Ⅰ	0	1	1	1
YDYY-TH-17-0863	YDYY-TH-17-0863-HE-Z0915490	invasive front	931.973	high	female	28	T1	N0	0	Ⅰ	0	0	0	0
YDYY-TH-17-0443	YDYY-TH-17-0443-HE-Z0921933	invasive front	931.739	high	male	43	T1	N0	0	Ⅰ	0	0	1	1
YDYY-TH-17-1232	YDYY-TH-17-1232-HE-Z0916107	invasive front	931.306	high	male	32	T2	N1	0	Ⅰ	0	0	1	1
YDYY-TH-17-1460	YDYY-TH-17-1460-HE-Z0905538	invasive front	930.161	high	female	51	T1	N0	0	Ⅰ	0	0	0	0
YDYY-TH-17-0726	YDYY-TH-17-0726-HE-Z0914737	invasive front	930.125	high	female	51	T1	N0	0	Ⅰ	1	0	0	0
YDYY-TH-17-1725	YDYY-TH-17-1725-HE-Z0902430	invasive front	929.917	high	female	43	T1	N1	0	Ⅰ	0	0	0	0
YDYY-TH-17-1561	YDYY-TH-17-1561-HE-Z0913852	invasive front	929.86	high	female	44	T1	N0	0	Ⅰ	0	0	0	0
YDYY-TH-17-0308	YDYY-TH-17-0308-HE-Z0602013	invasive front	929.003	high	male	30	T1	N0	0	Ⅰ	0	0	0	0
YDYY-TH-17-1879	YDYY-TH-17-1879-HE-Z0910081	invasive front	926.609	high	female	38	T1	N1	0	Ⅰ	0	0	0	0
YDYY-TH-17-0481	YDYY-TH-17-0481-HE-Z0922634	invasive front	925.953	high	female	46	T1	N1	0	Ⅰ	1	0	1	1
YDYY-TH-17-1909	YDYY-TH-17-1909-HE-Z0599238	invasive front	925.717	high	female	58	T1	N0	0	Ⅰ	0	0	0	0
YDYY-TH-17-1509	YDYY-TH-17-1509-HE-Z0904887	invasive front	925.134	high	male	64	T1	N0	0	Ⅰ	0	0	0	1
YDYY-TH-17-0821	YDYY-TH-17-0821-HE-Z0601431	invasive front	924.457	high	female	66	T1	N0	0	Ⅰ	1	0	0	0
YDYY-TH-17-1432	YDYY-TH-17-1432-HE-Z0914397	invasive front	924.339	high	female	59	T1	N0	0	Ⅰ	0	0	0	0
YDYY-TH-17-0327	YDYY-TH-17-0327-HE-Z0907480	invasive front	921.769	high	female	42	T1	N1	0	Ⅰ	0	0	1	1
YDYY-TH-17-1063	YDYY-TH-17-1063-HE-Z0600823	invasive front	920.934	high	male	45	T2	N0	0	Ⅰ	0	0	0	0
YDYY-TH-17-1282	YDYY-TH-17-1282-HE-Z0911825	invasive front	918.363	high	female	62	T3	N1	0	Ⅱ	0	1	1	1
YDYY-TH-17-1356	YDYY-TH-17-1356-HE-Z0922144	invasive front	916.932	high	female	35	T1	N1	0	Ⅰ	0	0	0	0
YDYY-TH-17-0974	YDYY-TH-17-0974-HE-Z0914423	invasive front	916.215	high	female	51	T1	N1	0	Ⅰ	0	0	0	0
YDYY-TH-17-1344	YDYY-TH-17-1344-HE-Z0913494	invasive front	915.998	high	female	47	T1	N0	0	Ⅰ	0	0	1	1
YDYY-TH-17-1679	YDYY-TH-17-1679-HE-Z0600207	invasive front	915.866	high	male	48	T1	N1	0	Ⅰ	0	0	0	0
YDYY-TH-17-0750	YDYY-TH-17-0750-HE-Z0921913	invasive front	915.489	high	male	32	T1	N1	0	Ⅰ	0	0	1	1
YDYY-TH-17-0751	YDYY-TH-17-0751-HE-Z0914071	invasive front	911.701	high	male	59	T1	N1	0	Ⅱ	0	0	0	1
YDYY-TH-17-0545	YDYY-TH-17-0545-HE-Z0913911	invasive front	908.898	high	female	44	T1	N1	0	Ⅰ	0	0	0	0
YDYY-TH-17-1214	YDYY-TH-17-1214-HE-Z0914428	invasive front	908.673	high	male	56	T1	N1	0	Ⅱ	0	0	0	0
YDYY-TH-17-0391	YDYY-TH-17-0391-HE-Z0915234	invasive front	908.619	high	female	64	T1	N0	0	Ⅰ	0	0	0	0
YDYY-TH-17-1139	YDYY-TH-17-1139-HE-Z0599124	invasive front	907.093	low	female	44	T1	N1	0	Ⅰ	1	0	1	1
YDYY-TH-17-0628	YDYY-TH-17-0628-HE-Z0599973	invasive front	904.12	low	female	72	T2	N0	0	Ⅰ	0	0	0	0
YDYY-TH-17-0831	YDYY-TH-17-0831-HE-Z0905971	invasive front	904.083	low	female	47	T1	N0	0	Ⅰ	1	0	0	0
YDYY-TH-17-1087	YDYY-TH-17-1087-HE-Z0904092	invasive front	901.136	low	female	73	T1	N0	0	Ⅰ	0	0	0	0
YDYY-TH-17-0965	YDYY-TH-17-0965-HE-Z0916571	invasive front	901.086	low	female	31	T4	N1	0	Ⅰ	1	1	0	0
YDYY-TH-17-1964	YDYY-TH-17-1964-HE-Z0922173	invasive front	897.208	low	female	39	T1	N0	0	Ⅰ	1	0	0	1
YDYY-TH-17-0488	YDYY-TH-17-0488-HE-Z0905933	invasive front	896.127	low	female	59	T2	N1	0	Ⅱ	1	0	0	0
YDYY-TH-17-1925	YDYY-TH-17-1925-HE-Z0906349	invasive front	895.044	low	female	48	T1	N0	0	Ⅰ	0	0	0	0
YDYY-TH-17-1358	YDYY-TH-17-1358-HE-Z0915595	invasive front	894.53	low	female	63	T1	N0	0	Ⅰ	0	0	0	0
YDYY-TH-17-2141	YDYY-TH-17-2141-HE-Z0914857	invasive front	893.613	low	female	65	T1	N0	0	Ⅰ	0	0	1	1
YDYY-TH-17-1007	YDYY-TH-17-1007-HE-Z0600038	invasive front	892.878	low	female	60	T1	N0	0	Ⅰ	1	0	0	0
YDYY-TH-17-0203	YDYY-TH-17-0203-HE-Z0913574	invasive front	890.449	low	male	48	T1	N1	0	Ⅰ	0	0	1	1
YDYY-TH-17-1097	YDYY-TH-17-1097-HE-Z0902826	invasive front	890.002	low	female	65	T1	N1	0	Ⅱ	0	0	0	0
YDYY-TH-17-0237	YDYY-TH-17-0237-HE-Z0601160	invasive front	888.672	low	male	67	T1	N0	0	Ⅰ	0	0	1	1
YDYY-TH-17-0777	YDYY-TH-17-0777-HE-Z0918395	invasive front	888.284	low	female	55	T1	N0	0	Ⅰ	0	0	1	1
YDYY-TH-17-0685	YDYY-TH-17-0685-HE-Z0905675	invasive front	887.221	low	female	49	T1	N0	0	Ⅰ	1	0	0	0
YDYY-TH-17-0878	YDYY-TH-17-0878-HE-Z0919360	invasive front	883.216	low	female	60	T1	N0	0	Ⅰ	0	0	0	0
YDYY-TH-17-0258	YDYY-TH-17-0258-HE-Z0906152	invasive front	882.543	low	male	41	T4	N1	0	Ⅰ	0	1	0	0
YDYY-TH-17-1045	YDYY-TH-17-1045-HE-Z0911252	invasive front	876.854	low	female	53	T1	N0	0	Ⅰ	0	0	0	0
YDYY-TH-17-2039	YDYY-TH-17-2039-HE-Z0602064	invasive front	875.34	low	male	71	T1	N0	0	Ⅰ	0	0	1	1
YDYY-TH-17-1226	YDYY-TH-17-1226-HE-Z0601360	invasive front	872.901	low	female	30	T1	N0	0	Ⅰ	0	0	0	0
YDYY-TH-17-1073	YDYY-TH-17-1073-HE-Z0917414	invasive front	872.524	low	male	65	T1	N0	0	Ⅰ	0	0	0	0
YDYY-TH-17-1906	YDYY-TH-17-1906-HE-Z0904097	invasive front	871.541	low	female	70	T1	N0	0	Ⅰ	0	0	1	1
YDYY-TH-17-1190	YDYY-TH-17-1190-HE-Z0915688	invasive front	870.147	low	female	39	T2	N1	0	Ⅰ	0	0	0	0
YDYY-TH-17-2134	YDYY-TH-17-2134-HE-Z0601121	invasive front	867.764	low	male	44	T1	N0	0	Ⅰ	0	0	0	0
YDYY-TH-17-0533	YDYY-TH-17-0533-HE-Z0599871	invasive front	864.508	low	female	58	T1	N0	0	Ⅰ	0	0	0	0
YDYY-TH-17-1571	YDYY-TH-17-1571-HE-Z0918211	invasive front	864.424	low	female	49	T1	N0	0	Ⅰ	1	0	0	0
YDYY-TH-17-0353	YDYY-TH-17-0353-HE-Z0911162	invasive front	863.531	low	male	54	T1	N0	0	Ⅰ	0	0	0	0
YDYY-TH-17-1339	YDYY-TH-17-1339-HE-Z0906529	invasive front	863.364	low	female	57	T3	N0	0	Ⅱ	0	1	0	0
YDYY-TH-17-0226	YDYY-TH-17-0226-HE-Z0904405	invasive front	862.262	low	female	42	T1	N0	0	Ⅰ	1	0	0	0
YDYY-TH-17-0117	YDYY-TH-17-0117-HE-Z0917644	invasive front	860.776	low	female	42	T1	N0	0	Ⅰ	0	0	0	0
YDYY-TH-17-0269	YDYY-TH-17-0269-HE-Z0916000	invasive front	859.8	low	male	29	T1	N1	0	Ⅰ	0	0	0	0
YDYY-TH-17-2037	YDYY-TH-17-2037-HE-Z0919356	invasive front	858.904	low	male	39	T1	N0	0	Ⅰ	0	0	0	0
YDYY-TH-17-0305	YDYY-TH-17-0305-HE-Z0918075	invasive front	858.733	low	female	54	T1	N0	0	Ⅰ	0	0	0	0
YDYY-TH-17-1868	YDYY-TH-17-1868-HE-Z0910773	invasive front	858.173	low	female	58	T1	N0	0	Ⅰ	0	0	0	0
YDYY-TH-17-0116	YDYY-TH-17-0116-HE-Z0913757	invasive front	856.882	low	female	54	T1	N1	0	Ⅰ	0	0	1	1
YDYY-TH-17-1797	YDYY-TH-17-1797-HE-Z0916716	invasive front	856.772	low	female	50	T1	N0	0	Ⅰ	0	0	0	0
YDYY-TH-17-1188	YDYY-TH-17-1188-HE-Z0910256	invasive front	856.384	low	female	58	T1	N1	0	Ⅱ	1	0	1	1
YDYY-TH-17-0209	YDYY-TH-17-0209-HE-Z0907391	invasive front	850.103	low	male	65	T1	N0	0	Ⅰ	0	0	0	0
YDYY-TH-17-1118	YDYY-TH-17-1118-HE-Z0902751	invasive front	848.803	low	female	49	T1	N0	0	Ⅰ	0	0	0	0
YDYY-TH-17-1288	YDYY-TH-17-1288-HE-Z0922261	invasive front	848.083	low	male	53	T1	N0	0	Ⅰ	0	0	0	0
YDYY-TH-17-0574	YDYY-TH-17-0574-HE-Z0916178	invasive front	843.646	low	male	56	T1	N0	0	Ⅰ	0	0	1	1
YDYY-TH-17-1435	YDYY-TH-17-1435-HE-Z0911448	invasive front	840.603	low	female	57	T1	N0	0	Ⅰ	0	0	0	0
YDYY-TH-17-0684	YDYY-TH-17-0684-HE-Z0904788	invasive front	839.3	low	female	59	T1	N0	0	Ⅰ	0	0	0	0
YDYY-TH-17-1158	YDYY-TH-17-1158-HE-Z0914526	invasive front	837.562	low	female	48	T1	N0	0	Ⅰ	1	0	0	0
YDYY-TH-17-0873	YDYY-TH-17-0873-HE-Z0916097	invasive front	834.885	low	female	54	T1	N0	0	Ⅰ	1	0	0	0
YDYY-TH-17-2142	YDYY-TH-17-2142-HE-Z0910287	invasive front	832.209	low	male	55	T1	N0	0	Ⅰ	0	0	1	1
YDYY-TH-17-1442	YDYY-TH-17-1442-HE-Z0916096	invasive front	830.434	low	female	33	T1	N1	0	Ⅰ	0	0	0	0
YDYY-TH-17-0869	YDYY-TH-17-0869-HE-Z0602317	invasive front	830.038	low	female	60	T1	N0	0	Ⅰ	0	0	0	1
YDYY-TH-17-1655	YDYY-TH-17-1655-HE-Z0909392	invasive front	829.922	low	female	43	T1	N1	0	Ⅰ	0	0	0	0
YDYY-TH-17-0491	YDYY-TH-17-0491-HE-Z0922050	invasive front	828.254	low	female	37	T2	N1	0	Ⅰ	1	0	1	1
YDYY-TH-17-1427	YDYY-TH-17-1427-HE-Z0911360	invasive front	827.393	low	male	65	T1	N0	0	Ⅰ	1	0	0	0
YDYY-TH-17-1796	YDYY-TH-17-1796-HE-Z0916369	invasive front	827.349	low	female	34	T1	N0	0	Ⅰ	0	0	0	0
YDYY-TH-17-0888	YDYY-TH-17-0888-HE-Z0910110	invasive front	826.67	low	female	59	T1	N0	0	Ⅰ	0	0	0	1
YDYY-TH-17-1552	YDYY-TH-17-1552-HE-Z0919832	invasive front	824.721	low	female	40	T1	N0	0	Ⅰ	0	0	1	1
YDYY-TH-17-1839	YDYY-TH-17-1839-HE-Z0599150	invasive front	822.934	low	female	55	T1	N0	0	Ⅰ	1	0	0	0
YDYY-TH-17-2161	YDYY-TH-17-2161-HE-Z0913948	invasive front	822.249	low	male	53	T1	N1	0	Ⅰ	1	0	0	0
YDYY-TH-17-0502	YDYY-TH-17-0502-HE-Z0916975	invasive front	820.253	low	female	45	T1	N0	0	Ⅰ	0	0	1	1
YDYY-TH-17-1083	YDYY-TH-17-1083-HE-Z0914702	invasive front	817.127	low	female	59	T1	N0	0	Ⅰ	0	0	0	0
YDYY-TH-17-0252	YDYY-TH-17-0252-HE-Z0906755	invasive front	816.96	low	male	45	T1	N0	0	Ⅰ	0	0	1	1
YDYY-TH-17-1518	YDYY-TH-17-1518-HE-Z0915342	invasive front	813.806	low	female	54	T1	N0	0	Ⅰ	0	0	0	0
YDYY-TH-17-1805	YDYY-TH-17-1805-HE-Z0599867	invasive front	813.792	low	male	36	T1	N0	0	Ⅰ	0	0	0	0
YDYY-TH-17-1500	YDYY-TH-17-1500-HE-Z0902691	invasive front	812.272	low	female	42	T1	N0	0	Ⅰ	1	0	0	0
YDYY-TH-17-1464	YDYY-TH-17-1464-HE-Z0910481	invasive front	811.805	low	female	44	T1	N0	0	Ⅰ	0	0	0	0
YDYY-TH-17-1216	YDYY-TH-17-1216-HE-Z0902912	invasive front	811.73	low	female	53	T1	N0	0	Ⅰ	0	0	0	0
YDYY-TH-17-1395	YDYY-TH-17-1395-HE-Z0911138	invasive front	810.437	low	female	59	T1	N0	0	Ⅰ	0	0	0	0
YDYY-TH-17-0196	YDYY-TH-17-0196-HE-Z0906571	invasive front	810.291	low	female	39	T2	N1	0	Ⅰ	0	0	0	0
YDYY-TH-17-0580	YDYY-TH-17-0580-HE-Z0915524	invasive front	809.053	low	female	48	T1	N1	0	Ⅰ	1	0	1	1
YDYY-TH-17-0686	YDYY-TH-17-0686-HE-Z0910244	invasive front	808.219	low	female	43	T1	N1	0	Ⅰ	0	0	1	1
YDYY-TH-17-1054	YDYY-TH-17-1054-HE-Z0914895	invasive front	805.664	low	male	53	T1	N0	0	Ⅰ	0	0	0	0
YDYY-TH-17-1039	YDYY-TH-17-1039-HE-Z0916230	invasive front	805.166	low	male	51	T4	N0	0	Ⅰ	0	1	0	0
YDYY-TH-17-1927	YDYY-TH-17-1927-HE-Z0909683	invasive front	803.278	low	female	48	T1	N0	0	Ⅰ	0	0	1	1
YDYY-TH-17-1374	YDYY-TH-17-1374-HE-Z0919061	invasive front	803.234	low	male	53	T1	N0	0	Ⅰ	0	0	0	0
YDYY-TH-17-0572	YDYY-TH-17-0572-HE-Z0918106	invasive front	802.878	low	female	40	T1	N0	0	Ⅰ	1	0	0	0
YDYY-TH-17-1009	YDYY-TH-17-1009-HE-Z0919945	invasive front	802.269	low	female	39	T1	N0	0	Ⅰ	0	0	0	0
YDYY-TH-17-0979	YDYY-TH-17-0979-HE-Z0602080	invasive front	793.234	low	female	59	T1	N0	0	Ⅰ	0	0	0	0
YDYY-TH-17-0310	YDYY-TH-17-0310-HE-Z0914021	invasive front	792.164	low	female	57	T3	N1	0	Ⅱ	0	1	0	0
YDYY-TH-17-0340	YDYY-TH-17-0340-HE-Z0902733	invasive front	790.915	low	female	51	T1	N1	0	Ⅰ	0	0	0	0
YDYY-TH-17-1450	YDYY-TH-17-1450-HE-Z0599304	invasive front	785.542	low	female	58	T1	N1	0	Ⅱ	1	0	0	0
YDYY-TH-17-1854	YDYY-TH-17-1854-HE-Z0907426	invasive front	785.47	low	female	57	T1	N0	0	Ⅰ	0	0	0	0
YDYY-TH-17-1625	YDYY-TH-17-1625-HE-Z0911421	invasive front	785.176	low	female	34	T2	N1	0	Ⅰ	1	0	0	0
YDYY-TH-17-0063	YDYY-TH-17-0063-HE-Z0919511	invasive front	782.401	low	female	52	T1	N1	0	Ⅰ	1	0	0	0
YDYY-TH-17-0894	YDYY-TH-17-0894-HE-Z0910252	invasive front	781.854	low	female	43	T1	N1	0	Ⅰ	0	1	0	0
YDYY-TH-17-0278	YDYY-TH-17-0278-HE-Z0914000	invasive front	777.93	low	male	69	T1	N1	0	Ⅱ	0	0	1	1
YDYY-TH-17-0927	YDYY-TH-17-0927-HE-Z0915239	invasive front	773.701	low	male	53	T1	N0	0	Ⅰ	0	0	0	0
YDYY-TH-17-0737	YDYY-TH-17-0737-HE-Z0902062	invasive front	773.403	low	male	65	T1	N1	0	Ⅱ	1	0	0	0
YDYY-TH-17-2193	YDYY-TH-17-2193-HE-Z0909239	invasive front	769.482	low	male	44	T1	N1	0	Ⅰ	0	0	0	1
YDYY-TH-17-2186	YDYY-TH-17-2186-HE-Z0909176	invasive front	768.24	low	female	53	T1	N0	0	Ⅰ	1	0	1	1
YDYY-TH-17-2015	YDYY-TH-17-2015-HE-Z0917739	invasive front	767.717	low	female	72	T1	N1	0	Ⅱ	1	0	1	1
YDYY-TH-17-2113	YDYY-TH-17-2113-HE-Z0914901	invasive front	766.596	low	female	53	T1	N0	0	Ⅰ	0	0	0	0
YDYY-TH-17-2145	YDYY-TH-17-2145-HE-Z0602160	invasive front	763.401	low	female	39	T1	N0	0	Ⅰ	1	0	0	0
YDYY-TH-17-0962	YDYY-TH-17-0962-HE-Z0915897	invasive front	763.204	low	female	44	T1	N0	0	Ⅰ	0	0	1	1
YDYY-TH-17-0342	YDYY-TH-17-0342-HE-Z0901939	invasive front	762.702	low	female	66	T1	N0	0	Ⅰ	0	0	0	0
YDYY-TH-17-0206	YDYY-TH-17-0206-HE-Z0917081	invasive front	761.516	low	male	58	T1	N0	0	Ⅰ	0	0	0	0
YDYY-TH-17-0447	YDYY-TH-17-0447-HE-Z0913686	invasive front	759.947	low	female	69	T1	N0	0	Ⅰ	0	0	0	0
YDYY-TH-17-2164	YDYY-TH-17-2164-HE-Z0903968	invasive front	758.186	low	female	54	T1	N0	0	Ⅰ	0	0	1	1
YDYY-TH-17-0889	YDYY-TH-17-0889-HE-Z0906510	invasive front	757.718	low	male	54	T1	N1	0	Ⅰ	0	0	0	1
YDYY-TH-17-0573	YDYY-TH-17-0573-HE-Z0914455	invasive front	757.134	low	female	45	T1	N0	0	Ⅰ	0	0	1	1
YDYY-TH-17-1604	YDYY-TH-17-1604-HE-Z0910710	invasive front	756.246	low	female	34	T1	N0	0	Ⅰ	1	0	0	0
YDYY-TH-17-0636	YDYY-TH-17-0636-HE-Z0917634	invasive front	755.564	low	female	46	T1	N1	0	Ⅰ	0	0	0	0
YDYY-TH-17-1701	YDYY-TH-17-1701-HE-Z0917538	invasive front	752.623	low	female	60	T1	N0	0	Ⅰ	0	0	0	0
YDYY-TH-17-1244	YDYY-TH-17-1244-HE-Z0903081	invasive front	749.948	low	female	47	T4	N0	0	Ⅰ	1	1	1	1
YDYY-TH-17-2040	YDYY-TH-17-2040-HE-Z0915620	invasive front	747.866	low	female	59	T4	N0	0	Ⅲ	1	1	0	0
YDYY-TH-17-2041	YDYY-TH-17-2041-HE-Z0917825	invasive front	747.26	low	female	53	T1	N0	0	Ⅰ	1	0	1	1
YDYY-TH-17-0482	YDYY-TH-17-0482-HE-Z0911210	invasive front	746.582	low	female	58	T1	N0	0	Ⅰ	0	0	0	0
YDYY-TH-17-1756	YDYY-TH-17-1756-HE-Z0914260	invasive front	745.809	low	female	54	T1	N0	0	Ⅰ	1	0	0	0
YDYY-TH-17-0588	YDYY-TH-17-0588-HE-Z0922392	invasive front	744.783	low	female	34	T1	N1	0	Ⅰ	0	0	0	0
YDYY-TH-17-0928	YDYY-TH-17-0928-HE-Z0922661	invasive front	743.186	low	female	51	T1	N0	0	Ⅰ	0	0	0	1
YDYY-TH-17-0167	YDYY-TH-17-0167-HE-Z0902291	invasive front	742.953	low	female	69	T1	N1	0	Ⅱ	1	0	0	0
YDYY-TH-17-0343	YDYY-TH-17-0343-HE-Z0917624	invasive front	742.863	low	female	49	T1	N0	0	Ⅰ	0	0	0	0
YDYY-TH-17-1932	YDYY-TH-17-1932-HE-Z0910977	invasive front	741.204	low	female	41	T1	N0	0	Ⅰ	0	0	0	0
YDYY-TH-17-0259	YDYY-TH-17-0259-HE-Z0915778	invasive front	740.636	low	female	56	T1	N0	0	Ⅰ	0	0	0	1
YDYY-TH-17-0082	YDYY-TH-17-0082-HE-Z0600087	invasive front	739.422	low	female	49	T1	N1	0	Ⅰ	1	0	0	0
YDYY-TH-17-0329	YDYY-TH-17-0329-HE-Z0901909	invasive front	738.904	low	female	36	T1	N0	0	Ⅰ	0	0	1	1
YDYY-TH-17-0824	YDYY-TH-17-0824-HE-Z0917842	invasive front	736.708	low	female	53	T1	N0	0	Ⅰ	0	0	0	0
YDYY-TH-17-0647	YDYY-TH-17-0647-HE-Z0913807	invasive front	736.146	low	female	34	T1	N1	0	Ⅰ	0	0	0	0
YDYY-TH-17-1508	YDYY-TH-17-1508-HE-Z0917474	invasive front	733.566	low	female	40	T2	N1	0	Ⅰ	0	0	0	0
YDYY-TH-17-1795	YDYY-TH-17-1795-HE-Z0601319	invasive front	733.243	low	female	50	T1	N1	0	Ⅰ	0	0	1	1
YDYY-TH-17-2010	YDYY-TH-17-2010-HE-Z0602435	invasive front	729.283	low	male	36	T1	N0	0	Ⅰ	1	0	0	0
YDYY-TH-17-0475	YDYY-TH-17-0475-HE-Z0909451	invasive front	726.958	low	female	65	T1	N1	0	Ⅱ	0	0	0	0
YDYY-TH-17-1275	YDYY-TH-17-1275-HE-Z0922287	invasive front	726.163	low	female	41	T1	N0	0	Ⅰ	0	0	0	0
YDYY-TH-17-0437	YDYY-TH-17-0437-HE-Z0600320	invasive front	723.592	low	female	28	T1	N0	0	Ⅰ	0	0	0	0
YDYY-TH-17-1170	YDYY-TH-17-1170-HE-Z0902173	invasive front	721.943	low	female	29	T1	N1	0	Ⅰ	0	0	0	0
YDYY-TH-17-0627	YDYY-TH-17-0627-HE-Z0905962	invasive front	720.185	low	male	60	T4	N0	0	Ⅲ	0	1	0	0
YDYY-TH-17-1637	YDYY-TH-17-1637-HE-Z0902883	invasive front	720.116	low	female	65	T1	N0	0	Ⅰ	0	0	0	0
YDYY-TH-17-1521	YDYY-TH-17-1521-HE-Z0600002	invasive front	716.447	low	female	43	T1	N1	0	Ⅰ	1	0	0	0
YDYY-TH-17-1542	YDYY-TH-17-1542-HE-Z0601045	invasive front	716.291	low	female	54	T1	N0	0	Ⅰ	0	0	0	0
YDYY-TH-17-1218	YDYY-TH-17-1218-HE-Z0917772	invasive front	716.246	low	male	44	T1	N1	0	Ⅰ	0	0	0	1
YDYY-TH-17-0765	YDYY-TH-17-0765-HE-Z0910048	invasive front	715.99	low	female	50	T1	N1	0	Ⅰ	0	0	0	0
YDYY-TH-17-1590	YDYY-TH-17-1590-HE-Z0909908	invasive front	714.25	low	female	57	T1	N0	0	Ⅰ	1	0	0	0
YDYY-TH-17-0991	YDYY-TH-17-0991-HE-Z0600266	invasive front	714.141	low	female	37	T1	N0	0	Ⅰ	1	0	1	1
YDYY-TH-17-0389	YDYY-TH-17-0389-HE-Z0601244	invasive front	712.146	low	female	52	T1	N0	0	Ⅰ	0	0	0	0
YDYY-TH-17-1401	YDYY-TH-17-1401-HE-Z0902031	invasive front	710.115	low	female	36	T1	N0	0	Ⅰ	0	0	0	0
YDYY-TH-17-0261	YDYY-TH-17-0261-HE-Z0916595	invasive front	709.631	low	female	52	T1	N0	0	Ⅰ	1	0	0	0
YDYY-TH-17-1894	YDYY-TH-17-1894-HE-Z0909715	invasive front	706.346	low	female	76	T1	N1	0	Ⅱ	0	0	0	0
YDYY-TH-17-0158	YDYY-TH-17-0158-HE-Z0902555	invasive front	705.397	low	male	60	T1	N0	0	Ⅰ	0	0	0	1
YDYY-TH-17-0275	YDYY-TH-17-0275-HE-Z0910947	invasive front	704.531	low	male	49	T2	N0	0	Ⅰ	0	0	1	1
YDYY-TH-17-1813	YDYY-TH-17-1813-HE-Z0916822	invasive front	703.741	low	male	35	T1	N1	0	Ⅰ	0	0	0	0
YDYY-TH-17-1187	YDYY-TH-17-1187-HE-Z0602396	invasive front	701.512	low	female	52	T1	N0	0	Ⅰ	0	0	0	0
YDYY-TH-17-1938	YDYY-TH-17-1938-HE-Z0918844	invasive front	698.563	low	female	35	T1	N1	0	Ⅰ	1	0	0	0
YDYY-TH-17-1342	YDYY-TH-17-1342-HE-Z0907868	invasive front	697.997	low	female	56	T1	N0	0	Ⅰ	1	0	0	0
YDYY-TH-17-0456	YDYY-TH-17-0456-HE-Z0903014	invasive front	696.935	low	female	69	T1	N0	0	Ⅰ	0	0	0	0
YDYY-TH-17-0245	YDYY-TH-17-0245-HE-Z0914238	invasive front	696.543	low	female	33	T1	N0	0	Ⅰ	0	0	0	0
YDYY-TH-17-0833	YDYY-TH-17-0833-HE-Z0902124	invasive front	694.417	low	female	43	T1	N0	0	Ⅰ	0	0	0	0
YDYY-TH-17-0652	YDYY-TH-17-0652-HE-Z0922396	invasive front	693.071	low	female	58	T1	N0	0	Ⅰ	1	0	0	0
YDYY-TH-17-1201	YDYY-TH-17-1201-HE-Z0909751	invasive front	692.98	low	female	57	T3	N0	0	Ⅱ	1	1	0	0
YDYY-TH-17-1535	YDYY-TH-17-1535-HE-Z0904408	invasive front	692.542	low	female	55	T1	N0	0	Ⅰ	1	0	1	1
YDYY-TH-17-1606	YDYY-TH-17-1606-HE-Z0905399	invasive front	688.004	low	male	35	T1	N1	0	Ⅰ	1	0	0	0
YDYY-TH-17-1753	YDYY-TH-17-1753-HE-Z0914444	invasive front	681.486	low	male	28	T1	N1	0	Ⅰ	0	0	1	1
YDYY-TH-17-1920	YDYY-TH-17-1920-HE-Z0600780	invasive front	681.193	low	female	44	T1	N0	0	Ⅰ	0	0	0	0
YDYY-TH-17-0134	YDYY-TH-17-0134-HE-Z0904340	invasive front	681.053	low	female	61	T1	N0	0	Ⅰ	1	0	1	1
YDYY-TH-17-1901	YDYY-TH-17-1901-HE-Z0917908	invasive front	678.053	low	male	48	T1	N0	0	Ⅰ	0	0	0	0
YDYY-TH-17-1365	YDYY-TH-17-1365-HE-Z0922172	invasive front	677.894	low	female	36	T1	N0	0	Ⅰ	0	0	0	0
YDYY-TH-17-0313	YDYY-TH-17-0313-HE-Z0599101	invasive front	677.588	low	male	53	T1	N1	0	Ⅰ	1	0	0	0
YDYY-TH-17-0593	YDYY-TH-17-0593-HE-Z0908977	invasive front	674.56	low	female	54	T1	N0	0	Ⅰ	0	0	0	1
YDYY-TH-17-1292	YDYY-TH-17-1292-HE-Z0600805	invasive front	674.017	low	female	55	T1	N0	0	Ⅰ	1	0	1	1
YDYY-TH-17-0966	YDYY-TH-17-0966-HE-Z0915616	invasive front	673.446	low	female	38	T1	N0	0	Ⅰ	0	0	0	1
YDYY-TH-17-0682	YDYY-TH-17-0682-HE-Z0601392	invasive front	672.685	low	female	41	T1	N0	0	Ⅰ	0	0	0	0
YDYY-TH-17-1872	YDYY-TH-17-1872-HE-Z0902290	invasive front	671.717	low	female	42	T1	N0	0	Ⅰ	0	0	0	1
YDYY-TH-17-0787	YDYY-TH-17-0787-HE-Z0901986	invasive front	669.839	low	male	46	T2	N1	0	Ⅰ	0	0	0	0
YDYY-TH-17-1917	YDYY-TH-17-1917-HE-Z0917162	invasive front	669.524	low	female	42	T1	N0	0	Ⅰ	0	0	0	0
YDYY-TH-17-0515	YDYY-TH-17-0515-HE-Z0906295	invasive front	668.211	low	female	56	T1	N0	0	Ⅰ	0	0	0	0
YDYY-TH-17-0642	YDYY-TH-17-0642-HE-Z0907568	invasive front	666.863	low	female	28	T2	N1	0	Ⅰ	0	0	0	0
YDYY-TH-17-0315	YDYY-TH-17-0315-HE-Z0914922	invasive front	666.797	low	female	48	T1	N0	0	Ⅰ	0	0	0	0
YDYY-TH-17-1389	YDYY-TH-17-1389-HE-Z0907307	invasive front	665.147	low	female	39	T1	N1	0	Ⅰ	1	0	0	1
YDYY-TH-17-1912	YDYY-TH-17-1912-HE-Z0922584	invasive front	662.574	low	female	39	T1	N0	0	Ⅰ	0	0	0	0
YDYY-TH-17-0614	YDYY-TH-17-0614-HE-Z0914961	invasive front	662.541	low	female	56	T1	N0	0	Ⅰ	1	0	0	0
YDYY-TH-17-1934	YDYY-TH-17-1934-HE-Z0921651	invasive front	662.505	low	male	48	T1	N0	0	Ⅰ	0	0	0	1
YDYY-TH-17-2094	YDYY-TH-17-2094-HE-Z0913544	invasive front	660.177	low	female	31	T1	N0	0	Ⅰ	0	0	0	0
YDYY-TH-17-1270	YDYY-TH-17-1270-HE-Z0600349	invasive front	658.064	low	female	57	T1	N0	0	Ⅰ	0	0	0	0
YDYY-TH-17-1892	YDYY-TH-17-1892-HE-Z0917874	invasive front	657.377	low	female	51	T3	N0	0	Ⅰ	0	0	1	1
YDYY-TH-17-0499	YDYY-TH-17-0499-HE-Z0919359	invasive front	654.781	low	female	34	T1	N0	0	Ⅰ	0	0	0	1
YDYY-TH-17-0505	YDYY-TH-17-0505-HE-Z0601264	invasive front	654.253	low	female	59	T1	N0	0	Ⅰ	1	0	0	0
YDYY-TH-17-1171	YDYY-TH-17-1171-HE-Z0909203	invasive front	651.418	low	female	41	T1	N0	0	Ⅰ	1	0	0	0
YDYY-TH-17-2105	YDYY-TH-17-2105-HE-Z0913995	invasive front	647.531	low	female	30	T2	N0	0	Ⅰ	0	0	0	0
YDYY-TH-17-1783	YDYY-TH-17-1783-HE-Z0600096	invasive front	646.198	low	male	45	T1	N0	0	Ⅰ	0	1	0	0
YDYY-TH-17-1296	YDYY-TH-17-1296-HE-Z0599990	invasive front	645.946	low	male	40	T1	N1	0	Ⅰ	0	0	0	0
YDYY-TH-17-1551	YDYY-TH-17-1551-HE-Z0916181	invasive front	642.559	low	male	31	T1	N0	0	Ⅰ	0	0	0	0
YDYY-TH-17-0508	YDYY-TH-17-0508-HE-Z0906781	invasive front	641.716	low	female	47	T1	N1	0	Ⅰ	1	0	0	0
YDYY-TH-17-1249	YDYY-TH-17-1249-HE-Z0914629	invasive front	641.311	low	female	64	T2	N1	0	Ⅱ	0	0	0	0
YDYY-TH-17-1993	YDYY-TH-17-1993-HE-Z0917295	invasive front	637.506	low	female	39	T1	N0	0	Ⅰ	0	0	0	0
YDYY-TH-17-0286	YDYY-TH-17-0286-HE-Z0902236	invasive front	636.322	low	male	38	T3	N0	0	Ⅰ	0	0	0	0
YDYY-TH-17-1835	YDYY-TH-17-1835-HE-Z0913966	invasive front	634.28	low	female	37	T4	N0	0	Ⅰ	0	1	0	0
YDYY-TH-17-0425	YDYY-TH-17-0425-HE-Z0907864	invasive front	634.102	low	male	50	T1	N0	0	Ⅰ	0	0	0	0
YDYY-TH-17-1829	YDYY-TH-17-1829-HE-Z0601021	invasive front	633.183	low	female	39	T1	N0	0	Ⅰ	0	0	0	1
YDYY-TH-17-1457	YDYY-TH-17-1457-HE-Z0601303	invasive front	632.602	low	female	59	T1	N0	0	Ⅰ	1	0	0	1
YDYY-TH-17-1986	YDYY-TH-17-1986-HE-Z0907146	invasive front	631.655	low	male	39	T1	N1	0	Ⅰ	0	0	1	1
YDYY-TH-17-1581	YDYY-TH-17-1581-HE-Z0915118	invasive front	628.829	low	male	66	T1	N0	0	Ⅰ	0	0	0	0
YDYY-TH-17-1086	YDYY-TH-17-1086-HE-Z0905285	invasive front	628.737	low	male	65	T1	N0	0	Ⅰ	0	0	1	1
YDYY-TH-17-0392	YDYY-TH-17-0392-HE-Z0915826	invasive front	627.175	low	female	41	T2	N1	0	Ⅰ	0	0	0	0
YDYY-TH-17-0570	YDYY-TH-17-0570-HE-Z0913958	invasive front	626.899	low	male	59	T1	N1	0	Ⅱ	0	0	1	1
YDYY-TH-17-1354	YDYY-TH-17-1354-HE-Z0905471	invasive front	620.839	low	female	58	T1	N0	0	Ⅰ	0	0	0	0
YDYY-TH-17-1376	YDYY-TH-17-1376-HE-Z0906832	invasive front	620.573	low	female	36	T1	N0	0	Ⅰ	0	0	0	0
YDYY-TH-17-0879	YDYY-TH-17-0879-HE-Z0904082	invasive front	619.67	low	female	49	T1	N0	0	Ⅰ	1	0	0	0
YDYY-TH-17-1141	YDYY-TH-17-1141-HE-Z0910920	invasive front	619.584	low	female	59	T1	N0	0	Ⅰ	0	0	0	1
YDYY-TH-17-1025	YDYY-TH-17-1025-HE-Z0922388	invasive front	613.886	low	female	51	T1	N1	0	Ⅰ	0	0	1	1
YDYY-TH-17-1922	YDYY-TH-17-1922-HE-Z0913735	invasive front	612.84	low	male	32	T1	N0	0	Ⅰ	0	0	0	0
YDYY-TH-17-1221	YDYY-TH-17-1221-HE-Z0921685	invasive front	611.493	low	female	30	T1	N1	0	Ⅰ	0	0	0	0
YDYY-TH-17-0219	YDYY-TH-17-0219-HE-Z0917160	invasive front	609.742	low	male	45	T2	N0	0	Ⅰ	0	0	0	0
YDYY-TH-17-1635	YDYY-TH-17-1635-HE-Z0902203	invasive front	609.015	low	female	40	T1	N0	0	Ⅰ	0	0	0	0
YDYY-TH-17-1032	YDYY-TH-17-1032-HE-Z0902467	invasive front	606.855	low	female	61	T1	N0	0	Ⅰ	1	0	1	1
YDYY-TH-17-2147	YDYY-TH-17-2147-HE-Z0902168	invasive front	604.268	low	female	69	T1	N0	0	Ⅰ	0	0	0	0
YDYY-TH-17-0509	YDYY-TH-17-0509-HE-Z0915345	invasive front	603.735	low	female	42	T1	N1	0	Ⅰ	0	0	0	0
YDYY-TH-17-1528	YDYY-TH-17-1528-HE-Z0916350	invasive front	603.664	low	male	73	T2	N1	0	Ⅱ	0	0	1	1
YDYY-TH-17-0130	YDYY-TH-17-0130-HE-Z0909482	invasive front	602.911	low	female	39	T1	N1	0	Ⅰ	0	0	0	0
YDYY-TH-17-1116	YDYY-TH-17-1116-HE-Z0915709	invasive front	601.282	low	female	52	T1	N0	0	Ⅰ	0	0	0	0
YDYY-TH-17-1862	YDYY-TH-17-1862-HE-Z0909967	invasive front	599.877	low	female	49	T1	N0	0	Ⅰ	0	0	0	0
YDYY-TH-17-1125	YDYY-TH-17-1125-HE-Z0914757	invasive front	598.439	low	female	55	T1	N1	0	Ⅱ	1	0	0	0
YDYY-TH-17-0803	YDYY-TH-17-0803-HE-Z0906692	invasive front	597.772	low	male	37	T1	N0	0	Ⅰ	1	0	0	0
YDYY-TH-17-1554	YDYY-TH-17-1554-HE-Z0917845	invasive front	592.579	low	male	44	T1	N0	0	Ⅰ	0	0	0	0
YDYY-TH-17-0559	YDYY-TH-17-0559-HE-Z0902608	invasive front	589.612	low	male	53	T1	N1	0	Ⅰ	0	0	0	0
YDYY-TH-17-0679	YDYY-TH-17-0679-HE-Z0918481	invasive front	587.703	low	female	58	T1	N0	0	Ⅰ	0	0	1	1
YDYY-TH-17-1294	YDYY-TH-17-1294-HE-Z0905074	invasive front	586.414	low	female	64	T1	N0	0	Ⅰ	1	0	0	0
YDYY-TH-17-1697	YDYY-TH-17-1697-HE-Z0906697	invasive front	584.492	low	female	60	T1	N0	0	Ⅰ	0	0	0	0
YDYY-TH-17-1791	YDYY-TH-17-1791-HE-Z0916190	invasive front	583.958	low	female	49	T1	N0	0	Ⅰ	1	0	0	1
YDYY-TH-17-0620	YDYY-TH-17-0620-HE-Z0910299	invasive front	577.402	low	female	29	T1	N0	0	Ⅰ	0	0	0	0
YDYY-TH-17-1706	YDYY-TH-17-1706-HE-Z0601594	invasive front	576.257	low	male	50	T1	N0	0	Ⅰ	0	0	0	0
YDYY-TH-17-1678	YDYY-TH-17-1678-HE-Z0915514	invasive front	574.962	low	female	33	T2	N1	0	Ⅰ	1	0	0	0
YDYY-TH-17-0378	YDYY-TH-17-0378-HE-Z0906677	invasive front	574.678	low	female	37	T1	N0	0	Ⅰ	1	0	1	1
YDYY-TH-17-1790	YDYY-TH-17-1790-HE-Z0903587	invasive front	573.817	low	female	49	T1	N0	0	Ⅰ	0	0	0	0
YDYY-TH-17-0925	YDYY-TH-17-0925-HE-Z0902502	invasive front	573.809	low	female	60	T1	N1	0	Ⅱ	0	0	0	0
YDYY-TH-17-0695	YDYY-TH-17-0695-HE-Z0909656	invasive front	569.369	low	female	47	T1	N1	0	Ⅰ	0	0	0	0
YDYY-TH-17-0005	YDYY-TH-17-0005-HE-Z0916095	invasive front	568.279	low	female	62	T1	N0	0	Ⅰ	1	0	1	1
YDYY-TH-17-0221	YDYY-TH-17-0221-HE-Z0914635	invasive front	567.53	low	female	57	T3	N0	0	Ⅱ	0	1	0	0
YDYY-TH-17-0591	YDYY-TH-17-0591-HE-Z0905308	invasive front	566.678	low	female	66	T1	N0	0	Ⅰ	0	0	0	1
YDYY-TH-17-1393	YDYY-TH-17-1393-HE-Z0915337	invasive front	566.172	low	female	29	T1	N0	0	Ⅰ	1	0	0	0
YDYY-TH-17-0963	YDYY-TH-17-0963-HE-Z0916488	invasive front	565.022	low	female	66	T1	N0	0	Ⅰ	0	0	0	1
YDYY-TH-17-0830	YDYY-TH-17-0830-HE-Z0919739	invasive front	564.063	low	male	58	T2	N1	0	Ⅱ	0	0	0	1
YDYY-TH-17-0660	YDYY-TH-17-0660-HE-Z0922676	invasive front	562.507	low	female	33	T1	N1	0	Ⅰ	0	0	1	1
YDYY-TH-17-2023	YDYY-TH-17-2023-HE-Z0922339	invasive front	560.506	low	female	52	T1	N0	0	Ⅰ	0	0	0	0
YDYY-TH-17-0609	YDYY-TH-17-0609-HE-Z0911575	invasive front	560.027	low	male	40	T1	N1	0	Ⅰ	0	0	0	0
YDYY-TH-17-0546	YDYY-TH-17-0546-HE-Z0915804	invasive front	558.423	low	male	56	T1	N0	0	Ⅰ	0	0	0	0
YDYY-TH-17-2185	YDYY-TH-17-2185-HE-Z0907117	invasive front	552.87	low	male	35	T1	N1	0	Ⅰ	0	0	1	1
YDYY-TH-17-1271	YDYY-TH-17-1271-HE-Z0909084	invasive front	552.856	low	female	53	T1	N0	0	Ⅰ	0	0	0	0
YDYY-TH-17-1886	YDYY-TH-17-1886-HE-Z0909674	invasive front	550.027	low	female	34	T1	N1	0	Ⅰ	0	0	1	1
YDYY-TH-17-2182	YDYY-TH-17-2182-HE-Z0904115	invasive front	547.338	low	male	51	T1	N0	0	Ⅰ	0	0	0	0
YDYY-TH-17-2027	YDYY-TH-17-2027-HE-Z0906946	invasive front	545.673	low	female	58	T1	N0	0	Ⅰ	0	0	1	1
YDYY-TH-17-1164	YDYY-TH-17-1164-HE-Z0913727	invasive front	545.292	low	male	38	T1	N1	0	Ⅰ	0	0	0	1
YDYY-TH-17-1033	YDYY-TH-17-1033-HE-Z0916882	invasive front	544.626	low	female	48	T1	N0	0	Ⅰ	0	0	0	0
YDYY-TH-17-1592	YDYY-TH-17-1592-HE-Z0915322	invasive front	544.465	low	female	68	T1	N1	0	Ⅱ	0	0	0	1
YDYY-TH-17-0372	YDYY-TH-17-0372-HE-Z0902932	invasive front	543.616	low	female	55	T1	N1	0	Ⅱ	1	0	1	1
YDYY-TH-17-1448	YDYY-TH-17-1448-HE-Z0909070	invasive front	543.572	low	female	47	T1	N1	0	Ⅰ	0	0	0	0
YDYY-TH-17-0571	YDYY-TH-17-0571-HE-Z0601143	invasive front	542.337	low	female	47	T1	N1	0	Ⅰ	0	0	0	1
YDYY-TH-17-1257	YDYY-TH-17-1257-HE-Z0601590	invasive front	541.945	low	male	47	T2	N1	0	Ⅰ	0	0	0	0
YDYY-TH-17-1717	YDYY-TH-17-1717-HE-Z0599769	invasive front	540.851	low	female	57	T1	N1	0	Ⅱ	0	0	1	1
YDYY-TH-17-0098	YDYY-TH-17-0098-HE-Z0913717	invasive front	539.34	low	female	59	T1	N0	0	Ⅰ	0	0	1	1
YDYY-TH-17-0036	YDYY-TH-17-0036-HE-Z0911755	invasive front	535.528	low	female	58	T1	N0	0	Ⅰ	1	0	0	0
YDYY-TH-17-2059	YDYY-TH-17-2059-HE-Z0907063	invasive front	531.458	low	male	35	T1	N1	0	Ⅰ	0	0	0	1
YDYY-TH-17-1029	YDYY-TH-17-1029-HE-Z0903862	invasive front	529.467	low	female	37	T1	N0	0	Ⅰ	0	0	0	0
YDYY-TH-17-1519	YDYY-TH-17-1519-HE-Z0910430	invasive front	527.181	low	male	60	T1	N0	0	Ⅰ	0	0	0	0
YDYY-TH-17-1695	YDYY-TH-17-1695-HE-Z0915758	invasive front	526.935	low	female	70	T1	N0	0	Ⅰ	1	0	0	0
YDYY-TH-17-0034	YDYY-TH-17-0034-HE-Z0916347	invasive front	523.162	low	female	59	T1	N0	0	Ⅰ	0	0	0	0
YDYY-TH-17-0160	YDYY-TH-17-0160-HE-Z0902989	invasive front	520.917	low	female	52	T1	N0	0	Ⅰ	0	0	1	1
YDYY-TH-17-0744	YDYY-TH-17-0744-HE-Z0905535	invasive front	520.115	low	female	71	T1	N0	0	Ⅰ	1	0	0	0
YDYY-TH-17-0673	YDYY-TH-17-0673-HE-Z0916587	invasive front	514.306	low	female	64	T1	N0	0	Ⅰ	0	0	0	1
YDYY-TH-17-1923	YDYY-TH-17-1923-HE-Z0904228	invasive front	512.568	low	female	54	T1	N0	0	Ⅰ	0	0	0	0
YDYY-TH-17-1700	YDYY-TH-17-1700-HE-Z0906334	invasive front	511.28	low	female	59	T2	N0	0	Ⅰ	1	0	0	0
YDYY-TH-17-1643	YDYY-TH-17-1643-HE-Z0602331	invasive front	509.564	low	female	66	T1	N0	0	Ⅰ	1	0	1	1
YDYY-TH-17-0985	YDYY-TH-17-0985-HE-Z0921795	invasive front	508.605	low	female	69	T1	N0	0	Ⅰ	0	0	0	0
YDYY-TH-17-0142	YDYY-TH-17-0142-HE-Z0921727	invasive front	507.654	low	male	47	T2	N1	0	Ⅰ	0	0	0	0
YDYY-TH-17-1142	YDYY-TH-17-1142-HE-Z0601822	invasive front	506.872	low	female	44	T1	N1	0	Ⅰ	0	0	0	0
YDYY-TH-17-0472	YDYY-TH-17-0472-HE-Z0904310	invasive front	505.417	low	male	46	T1	N0	0	Ⅰ	0	0	0	0
YDYY-TH-17-1198	YDYY-TH-17-1198-HE-Z0910042	invasive front	503.189	low	female	40	T1	N1	0	Ⅰ	1	0	0	0
YDYY-TH-17-2009	YDYY-TH-17-2009-HE-Z0907112	invasive front	502.62	low	female	42	T1	N0	0	Ⅰ	0	0	1	1
YDYY-TH-17-2067	YDYY-TH-17-2067-HE-Z0917242	invasive front	502.554	low	female	61	T1	N1	0	Ⅱ	1	0	1	1
YDYY-TH-17-2139	YDYY-TH-17-2139-HE-Z0905965	invasive front	498.64	low	female	63	T1	N0	0	Ⅰ	0	0	0	0
YDYY-TH-17-0159	YDYY-TH-17-0159-HE-Z0601111	invasive front	498.598	low	female	64	T1	N0	0	Ⅰ	0	0	1	1
YDYY-TH-17-0851	YDYY-TH-17-0851-HE-Z0918588	invasive front	497.066	low	female	60	T1	N0	0	Ⅰ	0	0	0	0
YDYY-TH-17-0234	YDYY-TH-17-0234-HE-Z0915854	invasive front	495.841	low	female	58	T1	N0	0	Ⅰ	0	0	0	0
YDYY-TH-17-1531	YDYY-TH-17-1531-HE-Z0916259	invasive front	494.322	low	female	50	T1	N0	0	Ⅰ	0	0	0	0
YDYY-TH-17-1657	YDYY-TH-17-1657-HE-Z0601340	invasive front	493.18	low	male	37	T2	N1	0	Ⅰ	0	0	0	0
YDYY-TH-17-0772	YDYY-TH-17-0772-HE-Z0907510	invasive front	492.602	low	female	55	T2	N1	0	Ⅱ	1	0	1	1
YDYY-TH-17-0838	YDYY-TH-17-0838-HE-Z0915681	invasive front	490.205	low	female	34	T1	N0	0	Ⅰ	1	0	0	0
YDYY-TH-17-0199	YDYY-TH-17-0199-HE-Z0913730	invasive front	484.692	low	female	46	T1	N0	0	Ⅰ	0	0	0	0
YDYY-TH-17-1311	YDYY-TH-17-1311-HE-Z0599152	invasive front	483.996	low	female	55	T1	N0	0	Ⅰ	0	0	0	0
YDYY-TH-17-1487	YDYY-TH-17-1487-HE-Z0916110	invasive front	483.296	low	male	31	T3	N1	0	Ⅰ	0	0	0	1
YDYY-TH-17-0815	YDYY-TH-17-0815-HE-Z0914973	invasive front	481.348	low	female	56	T1	N0	0	Ⅰ	1	0	0	1
YDYY-TH-17-1943	YDYY-TH-17-1943-HE-Z0916750	invasive front	480.332	low	female	48	T1	N1	0	Ⅰ	0	0	1	1
YDYY-TH-17-1043	YDYY-TH-17-1043-HE-Z0915481	invasive front	479.724	low	female	63	T2	N0	0	Ⅰ	1	0	1	1
YDYY-TH-17-1037	YDYY-TH-17-1037-HE-Z0906922	invasive front	479.392	low	female	44	T1	N0	0	Ⅰ	0	0	0	0
YDYY-TH-17-1228	YDYY-TH-17-1228-HE-Z0911494	invasive front	479.067	low	male	64	T4	N0	0	Ⅲ	0	1	0	0
YDYY-TH-17-0582	YDYY-TH-17-0582-HE-Z0916700	invasive front	477.833	low	female	53	T3	N0	0	Ⅰ	0	1	0	0
YDYY-TH-17-0884	YDYY-TH-17-0884-HE-Z0914571	invasive front	476.509	low	female	60	T1	N0	0	Ⅰ	0	0	0	0
YDYY-TH-17-0015	YDYY-TH-17-0015-HE-Z0903343	invasive front	475.598	low	female	37	T1	N0	0	Ⅰ	0	0	0	0
YDYY-TH-17-0440	YDYY-TH-17-0440-HE-Z0601936	invasive front	473.419	low	female	64	T1	N1	0	Ⅱ	1	0	0	1
YDYY-TH-17-0347	YDYY-TH-17-0347-HE-Z0600482	invasive front	473.38	low	female	51	T1	N0	0	Ⅰ	0	0	0	0
YDYY-TH-17-0058	YDYY-TH-17-0058-HE-Z0921699	invasive front	472.801	low	female	45	T1	N0	0	Ⅰ	0	0	0	0
YDYY-TH-17-0931	YDYY-TH-17-0931-HE-Z0922061	invasive front	471.998	low	female	47	T1	N0	0	Ⅰ	0	0	1	1
YDYY-TH-17-1996	YDYY-TH-17-1996-HE-Z0917269	invasive front	468.344	low	male	29	T1	N0	0	Ⅰ	0	0	0	1
YDYY-TH-17-1852	YDYY-TH-17-1852-HE-Z0905015	invasive front	466.016	low	female	47	T1	N1	0	Ⅰ	0	0	0	0
YDYY-TH-17-2174	YDYY-TH-17-2174-HE-Z0904223	invasive front	466.001	low	female	40	T1	N1	0	Ⅰ	1	0	1	1
YDYY-TH-17-0180	YDYY-TH-17-0180-HE-Z0905467	invasive front	465.895	low	female	77	T1	N0	0	Ⅰ	0	0	0	0
YDYY-TH-17-1005	YDYY-TH-17-1005-HE-Z0904142	invasive front	465.281	low	female	54	T1	N0	0	Ⅰ	0	0	0	0
YDYY-TH-17-1011	YDYY-TH-17-1011-HE-Z0921728	invasive front	464.694	low	female	58	T4	N1	0	Ⅲ	0	1	0	0
YDYY-TH-17-0713	YDYY-TH-17-0713-HE-Z0919305	invasive front	462.722	low	female	62	T1	N1	0	Ⅱ	0	0	0	1
YDYY-TH-17-1247	YDYY-TH-17-1247-HE-Z0910933	invasive front	462.168	low	female	51	T1	N0	0	Ⅰ	1	0	0	0
YDYY-TH-17-0145	YDYY-TH-17-0145-HE-Z0921736	invasive front	457.767	low	female	60	T1	N0	0	Ⅰ	1	0	0	0
YDYY-TH-17-1264	YDYY-TH-17-1264-HE-Z0906413	invasive front	456.975	low	female	44	T1	N0	0	Ⅰ	1	0	0	0
YDYY-TH-17-2146	YDYY-TH-17-2146-HE-Z0601821	invasive front	455.567	low	female	53	T1	N0	0	Ⅰ	0	0	0	0
YDYY-TH-17-1962	YDYY-TH-17-1962-HE-Z0907237	invasive front	455.435	low	female	40	T3	N1	0	Ⅰ	1	1	0	0
YDYY-TH-17-0260	YDYY-TH-17-0260-HE-Z0904112	invasive front	454.292	low	female	25	T3	N1	0	Ⅰ	1	1	0	0
YDYY-TH-17-0125	YDYY-TH-17-0125-HE-Z0914680	invasive front	453.539	low	female	38	T1	N0	0	Ⅰ	0	0	0	0
YDYY-TH-17-1470	YDYY-TH-17-1470-HE-Z0904412	invasive front	453.003	low	male	53	T1	N0	0	Ⅰ	0	0	0	0
YDYY-TH-17-0223	YDYY-TH-17-0223-HE-Z0922224	invasive front	452.722	low	female	58	T4	N0	0	Ⅲ	0	1	0	1
YDYY-TH-17-1133	YDYY-TH-17-1133-HE-Z0905286	invasive front	450.505	low	male	32	T1	N1	0	Ⅰ	0	0	0	0
YDYY-TH-17-0083	YDYY-TH-17-0083-HE-Z0907358	invasive front	450.22	low	male	38	T1	N1	0	Ⅰ	0	0	0	0
YDYY-TH-17-0007	YDYY-TH-17-0007-HE-Z0600170	invasive front	448.7	low	female	36	T1	N0	0	Ⅰ	0	0	0	0
YDYY-TH-17-0385	YDYY-TH-17-0385-HE-Z0917808	invasive front	447.653	low	female	40	T1	N0	0	Ⅰ	1	0	0	0
YDYY-TH-17-0886	YDYY-TH-17-0886-HE-Z0601046	invasive front	447.647	low	female	41	T1	N1	0	Ⅰ	0	0	0	0
YDYY-TH-17-1276	YDYY-TH-17-1276-HE-Z0902866	invasive front	446.157	low	female	64	T3	N0	0	Ⅱ	1	1	0	0
YDYY-TH-17-0382	YDYY-TH-17-0382-HE-Z0906506	invasive front	445.267	low	female	48	T1	N0	0	Ⅰ	1	0	0	0
YDYY-TH-17-1832	YDYY-TH-17-1832-HE-Z0913436	invasive front	444.862	low	female	35	T2	N1	0	Ⅰ	0	0	0	0
YDYY-TH-17-2153	YDYY-TH-17-2153-HE-Z0601465	invasive front	443.619	low	female	57	T1	N0	0	Ⅰ	0	0	0	1
YDYY-TH-17-1050	YDYY-TH-17-1050-HE-Z0921821	invasive front	442.201	low	female	44	T1	N1	0	Ⅰ	1	0	0	0
YDYY-TH-17-0598	YDYY-TH-17-0598-HE-Z0600530	invasive front	441.848	low	female	43	T1	N0	0	Ⅰ	1	0	0	0
YDYY-TH-17-1156	YDYY-TH-17-1156-HE-Z0911407	invasive front	437.961	low	male	42	T1	N1	0	Ⅰ	0	0	0	0
YDYY-TH-17-0626	YDYY-TH-17-0626-HE-Z0916549	invasive front	436.499	low	female	41	T1	N0	0	Ⅰ	1	0	0	0
YDYY-TH-17-0309	YDYY-TH-17-0309-HE-Z0919836	invasive front	435.689	low	male	51	T1	N0	0	Ⅰ	0	0	0	0
YDYY-TH-17-1274	YDYY-TH-17-1274-HE-Z0602376	invasive front	432.195	low	female	50	T1	N0	0	Ⅰ	0	0	0	0
YDYY-TH-17-0783	YDYY-TH-17-0783-HE-Z0913884	invasive front	428.647	low	female	48	T1	N0	0	Ⅰ	0	0	0	0
YDYY-TH-17-2051	YDYY-TH-17-2051-HE-Z0916439	invasive front	428.537	low	female	45	T1	N0	0	Ⅰ	0	0	0	0
YDYY-TH-17-2154	YDYY-TH-17-2154-HE-Z0921694	invasive front	426.716	low	female	62	T1	N0	0	Ⅰ	0	0	0	0
YDYY-TH-17-0466	YDYY-TH-17-0466-HE-Z0904262	invasive front	426.556	low	female	63	T1	N0	0	Ⅰ	0	0	1	1
YDYY-TH-17-0844	YDYY-TH-17-0844-HE-Z0922354	invasive front	425.763	low	female	49	T4	N1	0	Ⅰ	0	1	0	0
YDYY-TH-17-0618	YDYY-TH-17-0618-HE-Z0904644	invasive front	423.911	low	female	50	T1	N1	0	Ⅰ	0	0	0	0
YDYY-TH-17-0899	YDYY-TH-17-0899-HE-Z0600327	invasive front	423.228	low	female	41	T1	N0	0	Ⅰ	0	0	0	0
YDYY-TH-17-1075	YDYY-TH-17-1075-HE-Z0904246	invasive front	420.679	low	female	40	T2	N1	0	Ⅰ	0	0	0	0
YDYY-TH-17-0852	YDYY-TH-17-0852-HE-Z0903979	invasive front	420.229	low	female	37	T1	N0	0	Ⅰ	0	0	0	0
YDYY-TH-17-0285	YDYY-TH-17-0285-HE-Z0915197	invasive front	419.225	low	male	41	T1	N0	0	Ⅰ	0	0	1	1
YDYY-TH-17-1687	YDYY-TH-17-1687-HE-Z0910551	invasive front	418.163	low	female	81	T1	N0	0	Ⅰ	0	0	0	1
YDYY-TH-17-1306	YDYY-TH-17-1306-HE-Z0903605	invasive front	418.147	low	male	37	T2	N1	0	Ⅰ	0	0	0	0
YDYY-TH-17-0912	YDYY-TH-17-0912-HE-Z0909937	invasive front	412.003	low	male	35	T1	N0	0	Ⅰ	0	0	0	0
YDYY-TH-17-1151	YDYY-TH-17-1151-HE-Z0911662	invasive front	410.35	low	female	58	T1	N0	0	Ⅰ	0	0	0	0
YDYY-TH-17-0829	YDYY-TH-17-0829-HE-Z0905382	invasive front	408.681	low	female	46	T1	N1	0	Ⅰ	0	0	1	1
YDYY-TH-17-0640	YDYY-TH-17-0640-HE-Z0905281	invasive front	406.399	low	female	44	T1	N0	0	Ⅰ	1	0	1	1
YDYY-TH-17-0694	YDYY-TH-17-0694-HE-Z0905516	invasive front	404.518	low	female	37	T1	N1	0	Ⅰ	0	0	0	1
YDYY-TH-17-1876	YDYY-TH-17-1876-HE-Z0903589	invasive front	402.44	low	female	43	T1	N0	0	Ⅰ	0	0	0	1
YDYY-TH-17-0968	YDYY-TH-17-0968-HE-Z0918626	invasive front	401.439	low	female	57	T2	N0	0	Ⅰ	1	0	0	0
YDYY-TH-17-0822	YDYY-TH-17-0822-HE-Z0918295	invasive front	399.973	low	female	44	T4	N0	0	Ⅰ	1	1	1	1
YDYY-TH-17-0163	YDYY-TH-17-0163-HE-Z0600251	invasive front	399.727	low	male	36	T1	N1	0	Ⅰ	0	0	0	1
YDYY-TH-17-0944	YDYY-TH-17-0944-HE-Z0909688	invasive front	399.323	low	female	38	T1	N1	0	Ⅰ	0	0	0	0
YDYY-TH-17-2020	YDYY-TH-17-2020-HE-Z0913921	invasive front	399.09	low	male	84	T3	N1	0	Ⅱ	0	1	0	0
YDYY-TH-17-1110	YDYY-TH-17-1110-HE-Z0916438	invasive front	395.924	low	female	77	T1	N1	0	Ⅱ	1	0	1	1
YDYY-TH-17-0940	YDYY-TH-17-0940-HE-Z0599758	invasive front	394.953	low	female	61	T1	N0	0	Ⅰ	0	0	0	0
YDYY-TH-17-0569	YDYY-TH-17-0569-HE-Z0914393	invasive front	393.945	low	female	53	T1	N0	0	Ⅰ	0	0	1	1
YDYY-TH-17-0605	YDYY-TH-17-0605-HE-Z0913778	invasive front	392.759	low	female	58	T1	N0	0	Ⅰ	0	0	0	0
YDYY-TH-17-0498	YDYY-TH-17-0498-HE-Z0905943	invasive front	388.007	low	female	70	T2	N0	0	Ⅰ	0	0	0	0
YDYY-TH-17-0168	YDYY-TH-17-0168-HE-Z0907572	invasive front	386.602	low	female	53	T1	N0	0	Ⅰ	0	0	0	0
YDYY-TH-17-0820	YDYY-TH-17-0820-HE-Z0916760	invasive front	378.481	low	female	65	T1	N0	0	Ⅰ	0	0	0	0
YDYY-TH-17-1905	YDYY-TH-17-1905-HE-Z0915579	invasive front	371.316	low	female	59	T1	N0	0	Ⅰ	1	0	0	0
YDYY-TH-17-0282	YDYY-TH-17-0282-HE-Z0907031	invasive front	369.472	low	male	35	T1	N1	0	Ⅰ	0	0	0	1
YDYY-TH-17-1722	YDYY-TH-17-1722-HE-Z0600734	invasive front	368.294	low	female	49	T2	N1	0	Ⅰ	0	0	0	0
YDYY-TH-17-1727	YDYY-TH-17-1727-HE-Z0600149	invasive front	366.712	low	female	49	T1	N1	0	Ⅰ	1	0	0	0
YDYY-TH-17-0930	YDYY-TH-17-0930-HE-Z0902386	invasive front	366.119	low	female	51	T1	N0	0	Ⅰ	0	0	0	0
YDYY-TH-17-1975	YDYY-TH-17-1975-HE-Z0601803	invasive front	363.845	low	female	55	T3	N1	0	Ⅱ	0	0	1	1
YDYY-TH-17-1014	YDYY-TH-17-1014-HE-Z0915800	invasive front	360.938	low	female	34	T1	N1	0	Ⅰ	1	0	0	1
YDYY-TH-17-1251	YDYY-TH-17-1251-HE-Z0909522	invasive front	360.292	low	female	43	T2	N1	0	Ⅰ	1	0	0	0
YDYY-TH-17-1607	YDYY-TH-17-1607-HE-Z0917496	invasive front	360.223	low	female	46	T1	N0	0	Ⅰ	0	0	0	0
YDYY-TH-17-0758	YDYY-TH-17-0758-HE-Z0600540	invasive front	359.678	low	female	56	T1	N0	0	Ⅰ	0	0	0	0
YDYY-TH-17-1649	YDYY-TH-17-1649-HE-Z0600398	invasive front	359.03	low	male	62	T1	N0	0	Ⅰ	0	0	0	1
YDYY-TH-17-0666	YDYY-TH-17-0666-HE-Z0902783	invasive front	357.373	low	female	59	T1	N0	0	Ⅰ	1	0	1	1
YDYY-TH-17-1652	YDYY-TH-17-1652-HE-Z0902816	invasive front	357.099	low	female	38	T1	N0	0	Ⅰ	0	0	0	0
YDYY-TH-17-0952	YDYY-TH-17-0952-HE-Z0904260	invasive front	355.053	low	female	34	T2	N1	0	Ⅰ	0	0	1	1
YDYY-TH-17-0892	YDYY-TH-17-0892-HE-Z0920037	invasive front	355.044	low	female	59	T1	N1	0	Ⅱ	1	0	0	0
YDYY-TH-17-1503	YDYY-TH-17-1503-HE-Z0903791	invasive front	354.187	low	male	55	T4	N1	0	Ⅲ	0	1	0	1
YDYY-TH-17-1127	YDYY-TH-17-1127-HE-Z0600869	invasive front	354.025	low	female	53	T1	N0	0	Ⅰ	0	0	1	1
YDYY-TH-17-1863	YDYY-TH-17-1863-HE-Z0916905	invasive front	352.861	low	female	59	T2	N0	0	Ⅰ	0	0	0	0
YDYY-TH-17-1042	YDYY-TH-17-1042-HE-Z0922485	invasive front	351.323	low	female	64	T1	N0	0	Ⅰ	1	0	0	0
YDYY-TH-17-1434	YDYY-TH-17-1434-HE-Z0913941	invasive front	351.17	low	female	35	T1	N1	0	Ⅰ	0	0	0	0
YDYY-TH-17-1944	YDYY-TH-17-1944-HE-Z0921764	invasive front	348.888	low	female	58	T1	N0	0	Ⅰ	0	0	0	0
YDYY-TH-17-0070	YDYY-TH-17-0070-HE-Z0922528	invasive front	347.478	low	female	44	T1	N0	0	Ⅰ	1	0	1	1
YDYY-TH-17-0091	YDYY-TH-17-0091-HE-Z0903746	invasive front	346.402	low	female	56	T2	N0	0	Ⅰ	1	0	1	1
YDYY-TH-17-1702	YDYY-TH-17-1702-HE-Z0916401	invasive front	344.003	low	male	46	T1	N1	0	Ⅰ	0	0	1	1
YDYY-TH-17-2126	YDYY-TH-17-2126-HE-Z0920034	invasive front	343.349	low	male	56	T1	N0	0	Ⅰ	0	0	1	1
YDYY-TH-17-1195	YDYY-TH-17-1195-HE-Z0600676	invasive front	343.035	low	female	63	T1	N0	0	Ⅰ	0	0	0	0
YDYY-TH-17-0415	YDYY-TH-17-0415-HE-Z0902987	invasive front	338.549	low	female	48	T1	N0	0	Ⅰ	1	0	0	0
YDYY-TH-17-1078	YDYY-TH-17-1078-HE-Z0602007	invasive front	336.859	low	female	39	T1	N1	0	Ⅰ	1	0	0	0
YDYY-TH-17-0738	YDYY-TH-17-0738-HE-Z0922649	invasive front	336.272	low	female	60	T1	N1	0	Ⅱ	0	0	1	1
YDYY-TH-17-0859	YDYY-TH-17-0859-HE-Z0905496	invasive front	332.881	low	female	61	T1	N0	0	Ⅰ	0	0	0	0
YDYY-TH-17-0633	YDYY-TH-17-0633-HE-Z0601494	invasive front	332.114	low	female	63	T3	N1	0	Ⅱ	0	0	0	0
YDYY-TH-17-2172	YDYY-TH-17-2172-HE-Z0601965	invasive front	330.764	low	female	40	T1	N0	0	Ⅰ	0	0	0	0
YDYY-TH-17-0723	YDYY-TH-17-0723-HE-Z0600144	invasive front	329.541	low	female	29	T1	N1	0	Ⅰ	1	0	0	0
YDYY-TH-17-0895	YDYY-TH-17-0895-HE-Z0908880	invasive front	323.109	low	female	26	T1	N1	0	Ⅰ	1	0	0	0
YDYY-TH-17-1654	YDYY-TH-17-1654-HE-Z0910796	invasive front	319.614	low	female	36	T1	N0	0	Ⅰ	0	0	0	1
YDYY-TH-17-1875	YDYY-TH-17-1875-HE-Z0914794	invasive front	318.872	low	female	59	T3	N1	0	Ⅱ	0	1	0	1
YDYY-TH-17-1468	YDYY-TH-17-1468-HE-Z0905243	invasive front	318.668	low	male	46	T4	N1	0	Ⅰ	0	1	0	0
YDYY-TH-17-0983	YDYY-TH-17-0983-HE-Z0916387	invasive front	316.524	low	female	42	T1	N1	0	Ⅰ	0	0	0	0
YDYY-TH-17-0333	YDYY-TH-17-0333-HE-Z0601584	invasive front	315.644	low	female	42	T1	N0	0	Ⅰ	1	0	0	1
YDYY-TH-17-1384	YDYY-TH-17-1384-HE-Z0920138	invasive front	313.435	low	male	75	T1	N0	0	Ⅰ	0	0	0	1
YDYY-TH-17-0021	YDYY-TH-17-0021-HE-Z0919886	invasive front	313.194	low	female	55	T1	N0	0	Ⅰ	1	0	0	0
YDYY-TH-17-1429	YDYY-TH-17-1429-HE-Z0601457	invasive front	310.933	low	female	49	T1	N0	0	Ⅰ	0	0	0	0
YDYY-TH-17-0996	YDYY-TH-17-0996-HE-Z0915880	invasive front	310.596	low	female	34	T1	N0	0	Ⅰ	0	0	0	0
YDYY-TH-17-0839	YDYY-TH-17-0839-HE-Z0915617	invasive front	306.295	low	female	51	T1	N0	0	Ⅰ	0	0	0	0
YDYY-TH-17-1297	YDYY-TH-17-1297-HE-Z0905454	invasive front	306.008	low	female	48	T1	N1	0	Ⅰ	0	0	0	0
YDYY-TH-17-0445	YDYY-TH-17-0445-HE-Z0902865	invasive front	305.923	low	male	56	T1	N0	0	Ⅰ	1	0	0	1
YDYY-TH-17-0861	YDYY-TH-17-0861-HE-Z0905218	invasive front	305.698	low	female	42	T1	N0	0	Ⅰ	1	0	0	0
YDYY-TH-17-1601	YDYY-TH-17-1601-HE-Z0921686	invasive front	303.967	low	female	34	T1	N1	0	Ⅰ	1	0	1	1
YDYY-TH-17-0485	YDYY-TH-17-0485-HE-Z0910669	invasive front	300.209	low	male	54	T1	N1	0	Ⅰ	0	0	0	0
YDYY-TH-17-0768	YDYY-TH-17-0768-HE-Z0919978	invasive front	289.734	low	female	61	T1	N1	0	Ⅱ	1	0	1	1
YDYY-TH-17-0790	YDYY-TH-17-0790-HE-Z0905122	invasive front	282.329	low	male	59	T1	N1	0	Ⅱ	0	0	0	0
YDYY-TH-17-0357	YDYY-TH-17-0357-HE-Z0921737	invasive front	281.045	low	female	43	T1	N1	0	Ⅰ	1	0	0	0
YDYY-TH-17-0433	YDYY-TH-17-0433-HE-Z0601427	invasive front	278.339	low	female	22	T1	N0	0	Ⅰ	1	0	0	0
YDYY-TH-17-1660	YDYY-TH-17-1660-HE-Z0901945	invasive front	278.231	low	female	64	T1	N0	0	Ⅰ	0	0	0	0
YDYY-TH-17-0096	YDYY-TH-17-0096-HE-Z0903672	invasive front	277.885	low	female	58	T1	N0	0	Ⅰ	1	0	0	1
YDYY-TH-17-0331	YDYY-TH-17-0331-HE-Z0907770	invasive front	275.48	low	male	56	T2	N0	0	Ⅰ	0	0	0	0
YDYY-TH-17-1230	YDYY-TH-17-1230-HE-Z0905315	invasive front	273.984	low	female	32	T3	N1	0	Ⅰ	0	1	0	1
YDYY-TH-17-1792	YDYY-TH-17-1792-HE-Z0599233	invasive front	272.163	low	female	62	T1	N0	0	Ⅰ	0	0	0	0
YDYY-TH-17-0344	YDYY-TH-17-0344-HE-Z0600109	invasive front	271.989	low	female	48	T2	N1	0	Ⅰ	0	0	0	0
YDYY-TH-17-0951	YDYY-TH-17-0951-HE-Z0907631	invasive front	270.26	low	female	52	T3	N1	0	Ⅰ	0	1	0	0
YDYY-TH-17-0581	YDYY-TH-17-0581-HE-Z0922711	invasive front	268.18	low	female	37	T1	N0	0	Ⅰ	1	0	0	1
YDYY-TH-17-0001	YDYY-TH-17-0001-HE-Z0904762	invasive front	266.895	low	male	46	T1	N0	0	Ⅰ	0	0	0	1
YDYY-TH-17-0201	YDYY-TH-17-0201-HE-Z0915639	invasive front	265.423	low	female	42	T1	N0	0	Ⅰ	0	0	0	0
YDYY-TH-17-1254	YDYY-TH-17-1254-HE-Z0902120	invasive front	259.499	low	male	55	T1	N0	0	Ⅰ	0	0	0	0
YDYY-TH-17-0075	YDYY-TH-17-0075-HE-Z0916517	invasive front	257.809	low	female	44	T1	N0	0	Ⅰ	0	0	0	0
YDYY-TH-17-0469	YDYY-TH-17-0469-HE-Z0901999	invasive front	255.541	low	female	52	T2	N0	0	Ⅰ	0	0	0	0
YDYY-TH-17-0381	YDYY-TH-17-0381-HE-Z0922369	invasive front	255.51	low	male	60	T1	N0	0	Ⅰ	0	0	0	0
YDYY-TH-17-0099	YDYY-TH-17-0099-HE-Z0905936	invasive front	253.911	low	female	57	T1	N1	0	Ⅱ	0	0	0	0
YDYY-TH-17-1237	YDYY-TH-17-1237-HE-Z0901797	invasive front	252.422	low	female	41	T1	N0	0	Ⅰ	0	0	0	0
YDYY-TH-17-0731	YDYY-TH-17-0731-HE-Z0600571	invasive front	252	low	female	47	T1	N0	0	Ⅰ	0	0	0	0
YDYY-TH-17-0302	YDYY-TH-17-0302-HE-Z0918326	invasive front	249.612	low	male	73	T4	N1	0	Ⅲ	0	1	1	1
YDYY-TH-17-0553	YDYY-TH-17-0553-HE-Z0909008	invasive front	249.277	low	female	54	T1	N1	0	Ⅰ	0	0	0	1
YDYY-TH-17-0473	YDYY-TH-17-0473-HE-Z0904139	invasive front	243.651	low	female	42	T2	N1	0	Ⅰ	1	0	0	0
YDYY-TH-17-1713	YDYY-TH-17-1713-HE-Z0600488	invasive front	239.99	low	male	49	T1	N1	0	Ⅰ	0	0	0	0
YDYY-TH-17-0711	YDYY-TH-17-0711-HE-Z0916940	invasive front	238.434	low	female	51	T4	N1	0	Ⅰ	0	1	1	1
YDYY-TH-17-1238	YDYY-TH-17-1238-HE-Z0918559	invasive front	237.335	low	female	39	T1	N0	0	Ⅰ	1	0	0	0
YDYY-TH-17-0741	YDYY-TH-17-0741-HE-Z0903046	invasive front	234.496	low	female	49	T3	N1	0	Ⅰ	0	1	0	0
YDYY-TH-17-2097	YDYY-TH-17-2097-HE-Z0905433	invasive front	233.361	low	male	57	T1	N0	0	Ⅰ	0	0	0	0
YDYY-TH-17-1511	YDYY-TH-17-1511-HE-Z0918593	invasive front	232.778	low	female	67	T1	N0	0	Ⅰ	0	0	1	1
YDYY-TH-17-1899	YDYY-TH-17-1899-HE-Z0601040	invasive front	231.893	low	female	59	T1	N0	0	Ⅰ	0	0	1	1
YDYY-TH-17-0557	YDYY-TH-17-0557-HE-Z0906834	invasive front	230.859	low	male	60	T1	N0	0	Ⅰ	0	0	0	0
YDYY-TH-17-0262	YDYY-TH-17-0262-HE-Z0915129	invasive front	229.841	low	male	35	T2	N1	0	Ⅰ	0	0	1	1
YDYY-TH-17-0422	YDYY-TH-17-0422-HE-Z0905397	invasive front	229.696	low	female	46	T1	N0	0	Ⅰ	0	0	0	0
YDYY-TH-17-1440	YDYY-TH-17-1440-HE-Z0904611	invasive front	227.81	low	female	49	T1	N1	0	Ⅰ	0	0	0	1
YDYY-TH-17-1022	YDYY-TH-17-1022-HE-Z0908938	invasive front	226.778	low	female	54	T1	N1	0	Ⅰ	0	0	1	1
YDYY-TH-17-1059	YDYY-TH-17-1059-HE-Z0919211	invasive front	224.551	low	female	53	T1	N1	0	Ⅰ	0	0	0	0
YDYY-TH-17-0773	YDYY-TH-17-0773-HE-Z0901855	invasive front	218.632	low	female	42	T1	N0	0	Ⅰ	0	0	0	0
YDYY-TH-17-0463	YDYY-TH-17-0463-HE-Z0913462	invasive front	216.144	low	female	33	T1	N0	0	Ⅰ	1	0	0	0
YDYY-TH-17-2162	YDYY-TH-17-2162-HE-Z0600497	invasive front	215.776	low	female	57	T1	N1	0	Ⅱ	0	0	1	1
YDYY-TH-17-0413	YDYY-TH-17-0413-HE-Z0921791	invasive front	208.959	low	female	36	T1	N0	0	Ⅰ	1	0	0	0
YDYY-TH-17-0565	YDYY-TH-17-0565-HE-Z0916874	invasive front	206.856	low	male	52	T1	N1	0	Ⅰ	0	0	0	0
YDYY-TH-17-0784	YDYY-TH-17-0784-HE-Z0599971	invasive front	206.438	low	female	58	T1	N1	0	Ⅱ	1	0	0	0
YDYY-TH-17-1150	YDYY-TH-17-1150-HE-Z0905468	invasive front	201.66	low	female	42	T1	N1	0	Ⅰ	1	0	0	0
YDYY-TH-17-0848	YDYY-TH-17-0848-HE-Z0919557	invasive front	201.063	low	female	35	T2	N1	0	Ⅰ	0	0	1	1
YDYY-TH-17-0352	YDYY-TH-17-0352-HE-Z0921811	invasive front	193.232	low	female	38	T1	N1	0	Ⅰ	0	0	0	0
YDYY-TH-17-0707	YDYY-TH-17-0707-HE-Z0917015	invasive front	193.105	low	male	39	T1	N0	0	Ⅰ	0	0	0	0
YDYY-TH-17-0370	YDYY-TH-17-0370-HE-Z0911447	invasive front	192.671	low	female	65	T1	N0	0	Ⅰ	0	0	0	0
YDYY-TH-17-0002	YDYY-TH-17-0002-HE-Z0902911	invasive front	191.899	low	male	49	T1	N0	0	Ⅰ	0	0	0	0
YDYY-TH-17-0547	YDYY-TH-17-0547-HE-Z0600810	invasive front	191.324	low	female	35	T1	N0	0	Ⅰ	0	0	0	1
YDYY-TH-17-1546	YDYY-TH-17-1546-HE-Z0600600	invasive front	190.797	low	female	36	T1	N1	0	Ⅰ	1	0	1	1
YDYY-TH-17-1144	YDYY-TH-17-1144-HE-Z0918304	invasive front	181.279	low	female	58	T3	N1	0	Ⅱ	0	1	1	1
YDYY-TH-17-0733	YDYY-TH-17-0733-HE-Z0921814	invasive front	180.367	low	female	63	T1	N0	0	Ⅰ	0	0	0	0
YDYY-TH-17-0960	YDYY-TH-17-0960-HE-Z0917289	invasive front	180.064	low	female	40	T1	N0	0	Ⅰ	0	0	0	0
YDYY-TH-17-0390	YDYY-TH-17-0390-HE-Z0601273	invasive front	179.981	low	female	60	T2	N1	0	Ⅱ	0	0	0	0
YDYY-TH-17-0135	YDYY-TH-17-0135-HE-Z0600062	invasive front	179.293	low	female	39	T1	N0	0	Ⅰ	1	0	0	0
YDYY-TH-17-0948	YDYY-TH-17-0948-HE-Z0914823	invasive front	173.874	low	female	52	T1	N1	0	Ⅰ	1	0	1	1
YDYY-TH-17-0817	YDYY-TH-17-0817-HE-Z0601972	invasive front	171.186	low	female	36	T4	N1	0	Ⅰ	0	1	0	0
YDYY-TH-17-1668	YDYY-TH-17-1668-HE-Z0601722	invasive front	165.928	low	male	31	T1	N1	0	Ⅰ	0	0	0	0
YDYY-TH-17-0231	YDYY-TH-17-0231-HE-Z0914553	invasive front	165.254	low	female	43	T1	N0	0	Ⅰ	0	0	0	0
YDYY-TH-17-1209	YDYY-TH-17-1209-HE-Z0904996	invasive front	164.21	low	female	50	T1	N0	0	Ⅰ	0	0	0	0
YDYY-TH-17-2078	YDYY-TH-17-2078-HE-Z0920053	invasive front	163.267	low	female	41	T2	N0	0	Ⅰ	1	0	1	1
YDYY-TH-17-0520	YDYY-TH-17-0520-HE-Z0907000	invasive front	157.708	low	male	60	T2	N0	0	Ⅰ	0	0	1	1
YDYY-TH-17-0233	YDYY-TH-17-0233-HE-Z0601762	invasive front	155.139	low	male	37	T1	N1	0	Ⅰ	0	0	0	0
YDYY-TH-17-1079	YDYY-TH-17-1079-HE-Z0906987	invasive front	153.276	low	female	63	T1	N0	0	Ⅰ	0	0	1	1
YDYY-TH-17-0205	YDYY-TH-17-0205-HE-Z0600498	invasive front	146.239	low	female	38	T2	N1	0	Ⅰ	0	0	0	0
YDYY-TH-17-0397	YDYY-TH-17-0397-HE-Z0599900	invasive front	138.875	low	female	40	T1	N1	0	Ⅰ	0	0	0	0
YDYY-TH-17-2077	YDYY-TH-17-2077-HE-Z0917879	invasive front	136.489	low	female	30	T2	N1	0	Ⅰ	1	0	0	0
YDYY-TH-17-0907	YDYY-TH-17-0907-HE-Z0915276	invasive front	136.39	low	female	59	T2	N0	0	Ⅰ	0	0	1	1
YDYY-TH-17-0299	YDYY-TH-17-0299-HE-Z0905415	invasive front	129.784	low	female	41	T1	N0	0	Ⅰ	0	0	0	0
YDYY-TH-17-1754	YDYY-TH-17-1754-HE-Z0909904	invasive front	127.042	low	female	52	T1	N0	0	Ⅰ	1	0	0	0
YDYY-TH-17-0017	YDYY-TH-17-0017-HE-Z0903730	invasive front	124.953	low	female	43	T1	N1	0	Ⅰ	1	0	1	1
YDYY-TH-17-1364	YDYY-TH-17-1364-HE-Z0904117	invasive front	119.31	low	female	62	T1	N0	0	Ⅰ	1	0	0	0
YDYY-TH-17-0876	YDYY-TH-17-0876-HE-Z0907021	invasive front	119.024	low	male	69	T1	N0	0	Ⅰ	0	0	0	0
YDYY-TH-17-0585	YDYY-TH-17-0585-HE-Z0917498	invasive front	118.965	low	female	53	T4	N0	0	Ⅰ	0	1	0	1
YDYY-TH-17-0577	YDYY-TH-17-0577-HE-Z0915445	invasive front	114.919	low	male	51	T1	N1	0	Ⅰ	0	0	0	0
YDYY-TH-17-1709	YDYY-TH-17-1709-HE-Z0906857	invasive front	111.671	low	male	46	T2	N1	0	Ⅰ	1	0	0	0
YDYY-TH-17-1895	YDYY-TH-17-1895-HE-Z0916082	invasive front	102.135	low	male	34	T1	N0	0	Ⅰ	0	0	0	0
YDYY-TH-17-1978	YDYY-TH-17-1978-HE-Z0905567	invasive front	95.6412	low	male	69	T4	N1	0	Ⅳ	0	1	1	1
YDYY-TH-17-0236	YDYY-TH-17-0236-HE-Z0919009	invasive front	94.9317	low	female	37	T3	N1	0	Ⅰ	0	1	0	0
YDYY-TH-17-1708	YDYY-TH-17-1708-HE-Z0601184	invasive front	94.465	low	female	66	T1	N1	0	Ⅱ	0	0	0	1
YDYY-TH-17-0906	YDYY-TH-17-0906-HE-Z0910913	invasive front	88.6087	low	female	62	T1	N0	0	Ⅰ	0	0	1	1
YDYY-TH-17-1913	YDYY-TH-17-1913-HE-Z0601642	invasive front	79.7221	low	male	58	T1	N0	0	Ⅰ	0	0	0	0
YDYY-TH-17-1699	YDYY-TH-17-1699-HE-Z0918175	invasive front	75.0318	low	female	34	T1	N1	0	Ⅰ	0	0	0	1
YDYY-TH-17-1414	YDYY-TH-17-1414-HE-Z0902166	invasive front	72.3316	low	female	59	T1	N0	0	Ⅰ	0	0	0	1
YDYY-TH-17-1664	YDYY-TH-17-1664-HE-Z0910050	invasive front	68.948	low	female	73	T3	N0	0	Ⅱ	0	1	0	0
YDYY-TH-17-0530	YDYY-TH-17-0530-HE-Z0601613	invasive front	42.7077	low	male	36	T1	N0	0	Ⅰ	0	0	0	0
YDYY-TH-17-0732	YDYY-TH-17-0732-HE-Z0922329	invasive front	34.9778	low	female	51	T1	N1	0	Ⅰ	1	0	0	0
YDYY-TH-17-1574	YDYY-TH-17-1574-HE-Z0906625	invasive front	32.1199	low	female	61	T3	N0	0	Ⅱ	1	1	0	0
YDYY-TH-17-1991	YDYY-TH-17-1991-HE-Z0600487	invasive front	31.3928	low	female	26	T3	N1	0	Ⅰ	0	0	0	0
YDYY-TH-17-1814	YDYY-TH-17-1814-HE-Z0918010	invasive front	24.4501	low	female	47	T1	N1	0	Ⅰ	0	0	0	0
YDYY-TH-17-0291	YDYY-TH-17-0291-HE-Z0907113	invasive front	22.2148	low	female	43	T1	N1	0	Ⅰ	1	0	0	1
YDYY-TH-17-1082	YDYY-TH-17-1082-HE-Z0600675	invasive front	19.5502	low	male	46	T1	N0	0	Ⅰ	0	0	0	1
YDYY-TH-17-1693	YDYY-TH-17-1693-HE-Z0914235	invasive front	0	low	male	52	T1	N1	0	Ⅰ	0	0	1	1
